# Supplementary material
Source: PubMed Central journal article supplement (PMC3382072)
Supplement: NIHMS380828-supplement-1.pdf [file NIHMS380828-supplement-1.pdf]

Supplemental Table 1. Aux/IAA interaction partners<sup>1</sup>

|                                | IAA16 | IAA7 | IAA14 | IAA17 | IAA28 |
|--------------------------------|-------|------|-------|-------|-------|
| <b>Activating ARF Proteins</b> |       |      |       |       |       |
| ARF5                           | YES   | YES  | YES   | YES   | YES   |
| ARF6                           | YES   | YES  |       | YES   | YES   |
| ARF7                           | YES   | YES  | YES   | YES   | YES   |
| ARF8                           | YES   | YES  |       | YES   | YES   |
| ARF9                           | YES   |      |       | YES   | YES   |
| ARF19                          | YES   | YES  | YES   | YES   | YES   |
| <b>Repressing ARF Proteins</b> |       |      |       |       |       |
| ARF1                           |       |      |       |       |       |
| ARF2                           |       |      |       |       |       |
| ARF3                           |       |      |       |       |       |
| ARF4                           |       | YES  |       |       |       |
| ARF9                           | YES   |      |       | YES   | YES   |
| ARF10                          |       |      |       | YES   |       |
| ARF11                          |       |      |       |       |       |
| ARF12                          |       |      |       |       |       |
| ARF13                          |       |      |       |       |       |
| ARF14                          |       |      |       |       |       |
| ARF16                          |       |      |       |       |       |
| ARF17                          |       |      |       |       |       |
| ARF18                          |       |      |       |       |       |
| ARF20                          |       |      |       | YES   |       |
| ARF22                          | YES   | YES  |       |       | YES   |
| <b>Aux/IAA Proteins</b>        |       |      |       |       |       |
| IAA1                           | YES   | YES  | YES   | YES   | YES   |
| IAA2                           | YES   |      | YES   | YES   | YES   |
| IAA3                           | YES   |      | YES   | YES   | YES   |
| IAA4                           | YES   |      | YES   | YES   | YES   |
| IAA5                           | YES   | YES  | YES   | YES   | YES   |
| IAA6                           |       |      |       | YES   |       |
| IAA7                           |       |      |       | YES   | YES   |
| IAA8                           | YES   | YES  | YES   | YES   | YES   |
| IAA9                           | YES   |      | YES   | YES   | YES   |
| IAA10                          | YES   | YES  |       | YES   | YES   |
| IAA11                          | YES   |      |       |       | YES   |
| IAA12                          | YES   | YES  | YES   | YES   | YES   |
| IAA13                          | YES   | YES  | YES   | YES   |       |
| IAA14                          | YES   |      |       | YES   | YES   |
| IAA15                          | YES   | YES  |       | YES   |       |
| IAA16                          | YES   |      | YES   | YES   | YES   |
| IAA17                          | YES   | YES  | YES   | YES   | YES   |
| IAA18                          | YES   | YES  |       | YES   | YES   |
| IAA19                          | YES   |      | YES   | YES   | YES   |
| IAA20                          |       | YES  |       | YES   | YES   |
| IAA26                          | YES   |      | YES   | YES   | YES   |
| IAA27                          | YES   | YES  | YES   | YES   | YES   |
| IAA28                          | YES   | YES  | YES   | YES   |       |
| IAA29                          |       |      |       | YES   |       |
| IAA30                          | YES   | YES  |       |       | YES   |
| IAA31                          | YES   |      |       | YES   | YES   |
| IAA32                          | YES   | YES  |       |       |       |
| IAA33                          | YES   | YES  | YES   |       | YES   |
| IAA34                          | YES   | YES  | YES   | YES   | YES   |

<sup>1</sup>Data collected from yeast two hybrid assays described by Vernoux et al. (2011).
