# Supplementary material
Source: PubMed Central journal article supplement (PMC3382072)
Supplement: NIHMS380828-supplement-2.pdf [file NIHMS380828-supplement-2.pdf]

# Supplemental Dataset 1

```
begin data;
  dimensions ntax=123 nchar=784;
  format datatype=Protein interleave gap=- missing='.';
  matrix
[
  1
  60]
aAtIAA29_At4g32280 -----
P_trichocarpa_XP_002308067 -----
P_trichocarpa_XP_002324639 -----
P_trichocarpa_XP_002309635 -----
P_trichocarpa_XP_002300855 -----
P_trichocarpa_XP_002307573 -----
O_sativa_Os02g0141100_NP_001045857 -----
O_sativa_Os02g0805100_NP_001048437 -----
O_sativa_Os06g0166500_NP_001056915 -----
A_lyrata_XP_002864517 -----
P_trichocarpa_XP_002324470 -----
O_sativa_Os04g0653300_NP_001054106 -----
A_lyrata_XP_002878437 -----
aAtIAA33_At5g57420 -----
aAtIAA30_At3g62100 -----
A_lyrata_XP_002880275 -----
aAtIAA20_At2g46990 -----
P_trichocarpa_XP_002302809 -----
P_trichocarpa_XP_002320253 -----
O_sativa_Os01g0286900_NP_001042778 -----
O_sativa_Os02g0723400_NP_001047972 -----
A_lyrata_XP_002885218 -----
aAtIAA31_At3g17600 -----
O_sativa_Os11g0221300_NP_001067526 -----
A_lyrata_XP_002875064 -----
aAtIAA32_MEE10_At2g01200 -----
aAtIAA34_At1g15050 -----MYC
A_lyrata_XP_002892847 -----
P_trichocarpa_XP_002314837 -----
A_lyrata_XP_002869489 -----
aAtIAA11_At4g28640 -----
P_trichocarpa_XP_002303110 -----
O_sativa_Os02g0817600_NP_001048522 -----
A_lyrata_XP_002889491 -----
aAtIAA10_At1g04100 -----
A_lyrata_XP_002881274 -----
aAtIAA13_At2g33310 -----
A_lyrata_XP_002889513 -----
aAtIAA12_BDL_At1g04550 -----
P_trichocarpa_XP_002311698 -----
P_trichocarpa_XP_002314509 -----
A_lyrata_XP_002885143 -----
aAtIAA26_At3g16500 -----
A_lyrata_XP_002891672 -----
aAtIAA18_At1g51950 -----
O_sativa_Os02g0228900_NP_001046357 -----M
P_trichocarpa_XP_002309532 -----
P_trichocarpa_XP_002324753 -----
P_trichocarpa_XP_002303315 -----
O_sativa_Os01g0741900_NP_001044208 -----M
O_sativa_Os05g0523300_NP_001056086 -----M
O_sativa_Os01g0190300_NP_001042263 -----
A_lyrata_XP_002872184 -----
aAtIAA28_At5g25890 -----
O_sativa_Os08g0109400_NP_001060811 -----
P_patens_IAA1A_BAB71765 -----MNVS-EGCSTLTGAQLKYSTDKSNMSYETVYRDAAVE
P_patens_IAA1B_BAB71766 -----MKFSNEVVHKSMNIT-EDCSALTGALLKYSTDKSNMNFETLYRDAAVE
P_patens_XP_001765051 -----MKFSGEGSSVLTGAQLKYSSDKPNMNFETVCKDAHAE
A_lyrata_XP_002882951 -----
aAtIAA19_MSG2_At3g15540 -----
A_lyrata_XP_002894404 -----
aAtIAA6_SHY1_At1g52830 -----
P_trichocarpa_XP_002299626 -----
P_trichocarpa_XP_002304179 -----
A_lyrata_XP_002892874 -----
```



|                                    |                                           |
|------------------------------------|-------------------------------------------|
| aAtIAA33_At5g57420                 | -----MNSFEPQSQDSLQR-----RFH-----          |
| aAtIAA30_At3g62100                 | -----MGRGR-----                           |
| A_lyrata_XP_002880275              | -----MGRGR-----                           |
| aAtIAA20_At2g46990                 | -----MGRGR-----                           |
| P_trichocarpa_XP_002302809         | -----MGRGAA-----                          |
| P_trichocarpa_XP_002320253         | -----MGRGAT-----                          |
| O_sativa_Os01g0286900_NP_001042778 | -----MECMASTEESLPASSSMDS CSGELPT-----     |
| O_sativa_Os02g0723400_NP_001047972 | -----MEV-----                             |
| A_lyrata_XP_002885218              | -----MEV-----                             |
| aAtIAA31_At3g17600                 | -----MDPNT-----                           |
| O_sativa_Os11g0221300_NP_001067526 | -----MDPNT-----                           |
| A_lyrata_XP_002875064              | SDPPHPLHLVASDKQKQDKHLILSWKKPTMDS          |
| aAtIAA32_MEE10_At2g01200           | -----MDS-----                             |
| aAtIAA34_At1g15050                 | -----MDSN-----                            |
| A_lyrata_XP_002892847              | -----MEG-----GSASG-----SASALSND-----      |
| P_trichocarpa_XP_002314837         | -----MEG-----GSASG-----SASALSND-----      |
| A_lyrata_XP_002869489              | -----MQGGF-----LGGGSGGSVCMSTVSME-----     |
| aAtIAA11_At4g28640                 | -----MRG-----GVAG-----PTAGEPPGT-----      |
| P_trichocarpa_XP_002303110         | -----MNG-----LQDVCS SSGSVMI GLPAEED-----  |
| O_sativa_Os02g0817600_NP_001048522 | -----MNG-----LQEVCS SSGSVMI GLPAEED-----  |
| A_lyrata_XP_002889491              | -----MGK-----                             |
| aAtIAA10_At1g04100                 | -----MI TELEM GK-----                     |
| A_lyrata_XP_002881274              | -----MR-----                              |
| aAtIAA13_At2g33310                 | -----MR-----                              |
| A_lyrata_XP_002889513              | -----MS-----                              |
| aAtIAA12_BDL_At1g04550             | -----MEGCLGLLGGGGSSGASTNKSTLS-----        |
| P_trichocarpa_XP_002311698         | MEG---NREMGPKLLD-LIPQGRK-WYQEDKN---       |
| P_trichocarpa_XP_002314509         | MEGCPRNREIGPKLLD-LIPQGRK-WYQEDKN---       |
| A_lyrata_XP_002885143              | MEGYSRNGEISP KLLDLMI PQERRNWIHDEKNSV---   |
| aAtIAA26_At3g16500                 | MEGYSRNGEISP KLLDLMI PQERRNWFHDEKNSV---   |
| A_lyrata_XP_002891672              | GEASESMKKISRGRLLGGSWMPGPSDHHRHGDE---      |
| aAtIAA18_At1g51950                 | -----MTSEKEE-WHKS---H-----                |
| O_sativa_Os02g0228900_NP_001046357 | MEGCSKNVEACPQLLD-LIPKERE-WLKGEDER---      |
| P_trichocarpa_XP_002309532         | EEGSKNREGLPPQLLD-LIPDEKEWKLREALGLGR---    |
| P_trichocarpa_XP_002324753         | EEEFKDK-GLPPTLLH-LIPDGREWVKVEADGEG---     |
| P_trichocarpa_XP_002303315         | -----MAWRRG---FGREEEDA-----               |
| O_sativa_Os01g0741900_NP_001044208 | -----MKSSSVAPRLKQERQDDCKFQEGD-----        |
| O_sativa_Os05g0523300_NP_001056086 | SPQREVSNEGSSTLKEHDYFGLSEVLSSNSSSGKQPEK--- |
| O_sativa_Os01g0190300_NP_001042263 | SPQHEVSNEGSSTLKEHDYFGLSEVSSNSSSGKQPEK---  |
| A_lyrata_XP_002872184              | SSQHEESSESSTLKEHDYFGLSEVSSNSSSGDKQPEKG--- |
| aAtIAA28_At5g25890                 | -----ME-----KEG-----                      |
| O_sativa_Os08g0109400_NP_001060811 | -----ME-----KEG-----                      |
| P_patens_IAA1A_BAB71765            | -----MA-----KEG-----                      |
| P_patens_IAA1B_BAB71766            | -----MA-----KEG-----                      |
| P_patens_XP_001765051              | -----MA-----KEG-----                      |
| A_lyrata_XP_002882951              | -----MA-----QP-----                       |
| aAtIAA19_MSG2_At3g15540            | -----MA-----QP-----                       |
| A_lyrata_XP_002894404              | -----MA-----NESD-----                     |
| aAtIAA6_SHY1_At1g52830             | -----MA-----NESN-----                     |
| P_trichocarpa_XP_002299626         | -----MSSEEYVRVW-----P-----DSG-----        |
| P_trichocarpa_XP_002304179         | -----MSPEEYVRVW-----P-----DSG-----        |
| A_lyrata_XP_002892874              | -----MSPENGSNLL-----E---S---DAAN-----     |
| aAtIAA5_At1g15580                  | -----MSVETERSST-----E---SSA---ASG-----    |
| A_lyrata_XP_002887832              | -----MSVETERSST-----E---SSA---ASG-----    |
| aAtIAA15_At1g80390                 | -----MSTSSGADS-----SPP---VSG-----         |
| P_trichocarpa_XP_002299625         | -----MEAAVGY-----A-----ADS-----           |
| O_sativa_Os01g0178500_NP_001042192 | -----MEN-----                             |
| O_sativa_Os05g0178600_NP_001054800 | -----MA-----M-----AAE-----                |
| O_sativa_Os06g0597000_NP_001057986 | -----MASSSSLRSTSCLA-----SAA-----          |
| O_sativa_Os03g0633800_NP_001050714 | -----MERS-----MA-----YER-----             |
| O_sativa_Os12g0601400_NP_001067210 | -----MA-----MA-----YES-----               |
| O_sativa_Os03g0797800_NP_001051565 | -----ME-----FER-----                      |
| O_sativa_Os07g0182400_NP_001059051 | -----MEG-----ME-----FER-----              |
| P_trichocarpa_XP_002300804         | -----MEGG-----VA-----YEN-----             |
| P_trichocarpa_XP_002307625         | -----MEGG-----VA-----YEN-----             |
| P_trichocarpa_XP_002319642         | -----ME-----VIN-----                      |
| P_trichocarpa_XP_002328339         | -----ME-----VTN-----                      |
| P_trichocarpa_XP_002312567         | -----MA-----YE-----KVN-----               |
| P_trichocarpa_XP_002314656         | -----MA-----YE-----KVN-----               |
| A_lyrata_XP_002870306              | -----MA-----YE-----KVN-----               |
| aAtIAA1_AXR5_At4g14560             | -----MA-----YE-----KVN-----               |
| A_lyrata_XP_002885542              | -----MA-----YE-----KVN-----               |
| aAtIAA2_At3g23030                  | -----MA-----YE-----KVN-----               |

A\_lyrata\_XP\_002865407  
aAtIAA4\_At5g43700  
A\_lyrata\_XP\_002892202  
aAtIAA3\_SHY2\_At1g04240  
A\_lyrata\_XP\_002864971  
O\_sativa\_Os090527700\_NP\_001063732  
A\_lyrata\_XP\_002868277  
aAtIAA14\_SLR\_At4g14550  
A\_lyrata\_XP\_002883395  
aAtIAA7\_AXR2\_At3g23050  
P\_trichocarpa\_XP\_002311658  
A\_lyrata\_XP\_002889499  
aAtIAA17\_AXR3\_At1g04250  
A\_lyrata\_XP\_002884465  
aAtIAA16\_At3g04730  
P\_trichocarpa\_XP\_002302075  
P\_trichocarpa\_XP\_002328494  
P\_trichocarpa\_XP\_002319075  
P\_trichocarpa\_XP\_002306817  
O\_sativa\_Os03g0633500\_NP\_001050713  
O\_sativa\_Os12g0601300\_NP\_001067209  
O\_sativa\_Os03g0742900\_NP\_001051230  
O\_sativa\_Os01g0675700\_NP\_001043847  
O\_sativa\_Os05g0559400\_NP\_001056300  
O\_sativa\_Os01g0231000\_NP\_001042495  
O\_sativa\_Os06g0335500\_NP\_001057554  
P\_trichocarpa\_XP\_002298231  
P\_trichocarpa\_XP\_002303297  
P\_trichocarpa\_XP\_002331172  
A\_lyrata\_XP\_002867425  
aAtIAA27\_PAP2\_At4g29080  
aAtIAA8\_At2g22670  
aAtIAA9\_At5g65670  
A\_lyrata\_XP\_002864969  
A\_lyrata\_XP\_002878628  
A\_lyrata\_XP\_002862301  
P\_trichocarpa\_XP\_002302351

[  
180]

aAtIAA29\_At4g32280  
P\_trichocarpa\_XP\_002308067  
P\_trichocarpa\_XP\_002324639  
P\_trichocarpa\_XP\_002309635  
P\_trichocarpa\_XP\_002300855  
P\_trichocarpa\_XP\_002307573  
O\_sativa\_Os02g0141100\_NP\_001045857  
O\_sativa\_Os02g0805100\_NP\_001048437  
O\_sativa\_Os06g0166500\_NP\_001056915  
A\_lyrata\_XP\_002864517  
P\_trichocarpa\_XP\_002324470  
O\_sativa\_Os04g0653300\_NP\_001054106  
A\_lyrata\_XP\_002878437  
aAtIAA33\_At5g57420  
aAtIAA30\_At3g62100  
A\_lyrata\_XP\_002880275  
aAtIAA20\_At2g46990  
P\_trichocarpa\_XP\_002302809  
P\_trichocarpa\_XP\_002320253  
O\_sativa\_Os01g0286900\_NP\_001042778  
O\_sativa\_Os02g0723400\_NP\_001047972  
A\_lyrata\_XP\_002885218  
aAtIAA31\_At3g17600  
O\_sativa\_Os11g0221300\_NP\_001067526  
A\_lyrata\_XP\_002875064  
aAtIAA32\_MEE10\_At2g01200  
aAtIAA34\_At1g15050  
A\_lyrata\_XP\_002892847  
P\_trichocarpa\_XP\_002314837  
A\_lyrata\_XP\_002869489  
aAtIAA11\_At4g28640  
P\_trichocarpa\_XP\_002303110  
O\_sativa\_Os02g0817600\_NP\_001048522

-----MEKV-----DV-----YDE-----  
-----MEKV-----DV-----YDE-----  
-----MDE-----  
-----MDE-----  
AKPVHEFSGHNDNGVSDIAFSSDARFLASASDD-----  
-----MASYGDD-----  
-----  
-----MIG-----QL-----  
-----MIG-----QL-----  
-----MTTSVLGTE-----RTD-----  
-----MIG-----SVE-----  
-----MMG-----SVE-----  
-----M-----  
-----M-----  
-----MEVE-----KGTK-----  
-----MTSIMGAETA-----D-----TYSM-----  
-----MTSIMGAE-----P-----E-----KYSM-----  
-----MEVE-----KGTK-----  
-----MAG-----  
-----MAAD-----  
-----MAG-----  
-----DYIGLSA-----AAASP-----TPS-----SSSCSSSPNPG  
-----DYIGL-----AASP-----ASS-----SSSCCAS-TPV  
-----DYIGLS-----PPP-----PPS-----SSSAAARADD  
-----DYIGLS-----PAA-----AAA-----  
-----DYIGLS-----ETPSMENISEKLSSTSSSTLSTEEKNNSSSSNSNNNNKNN  
-----DYIGLS-----ETPSMEKISDKLSSS-----SS-TLSTEENIN-----SNSNSNSNSTN  
-----DYIGISS-----EVSSMEN-----TSG-----TDTINISTAS  
-----DYIGLS-----EFPTME-----E-----ATT-----MSDKTKTRDNN  
-----DYIGLS-----EFPTM-----E-----ATT-----MSDKTKTRDNN  
SPCLKERNYLGLS-----DCSSVD-----SST-----IPNVVG-----K  
-----GLKEHNYLGLS-----DCSSVG-----SST-----LSPLAEE-----DDK  
-----GLKEHNYLGLS-----DCSSVG-----SST-----LSSLAE-----DDK  
-----PGLKERNYLGLS-----DCSSVD-----SST-----IPNVE-----K  
-----GLKEHNYLGLS-----DCSSVG-----SST-----LSSLAE-----DDK  
-----ELKERNYMGLS-----DCSSVD-----SSA-----VSAASD-----ERK

121

--F---DL---NKHC-----AI-----EGAASC---L-----  
GQL---HL---GSYS-----WF-----STNDN-----  
GQL---QL---GQYS-----WF-----STNAN-----  
-DQ---ML---GSKP-----WI-----SCEDGN---Y-----  
-----MP-----FTASTF-----  
-----DPLS-----MP-----FAASTF-----  
-----LCPSRTDGLVH-----QG-----FPSSNFNQHMFKDALPD-----  
-----GS---GSAP-----VS-----ASSAG-----  
-----SELD-----LL-----NSAPG-----  
--Q---D---NTTT-----HQ-----PR-----  
-----MSQY-----TR-----PT-----  
--Q---Q---DTKR-----RL-----PA-----  
--SS---SSSS-----IE-----SSCKS-----  
--Q---D---NSTT-----QQ-----PR-----  
--SS---SSSS-----IE-----SSCKS-----  
--SS---SSSS-----IE-----SSSKS-----  
--SS---SSSS-----FE-----SSRYP-----  
--SS---SSSS-----FE-----SSNYP-----  
-----  
-----TT---TTAP-----AQ-----STASSG-----  
-----SN---SCSS-----FS-----SSSVDS-----  
-----SN---SCSS-----FS-----SSSVDS-----  
-----  
-----TADFFQGSKFKH-----TY-----YSQTKKG-----  
-----PADFFKGSKFKH-----TY-----YSQTKKG-----  
-----PLGVFPNSPKYH-----PY-----YSQTEF-----  
-----QHGVFPSSPKYH-----PY-----YPQNTTEC-----  
-----ASGFLLNPPALH-----ST-----YYQFPRED-----  
-----EN---LVVS-----CE-----DSSSP-----  
-----EN---LVVS-----CE-----DSSSP-----  
-----DN---VLMS-----SE-----DSSSP-----  
-----EA---EAEE-----VE-----ESSAG-----

|                                    |                                                                  |
|------------------------------------|------------------------------------------------------------------|
| A_lyrata_XP_002889491              | -----EN---AALS-----SE-----DSSRPDES--V-----                       |
| aAtIAA10_At1g04100                 | -----EN---AAHS-----SE-----DSSCPDES--V-----                       |
| A_lyrata_XP_002881274              | -----GE---SELE-----LG-----LG-LS-----                             |
| aAtIAA13_At2g33310                 | -----GE---SELE-----LG-----LG-LS-----                             |
| A_lyrata_XP_002889513              | -----GV---SELE-----VG-----KSNLP-----                             |
| aAtIAA12_BDL_At1g04550             | -----GV---SELE-----VG-----KSNLP-----                             |
| P_trichocarpa_XP_002311698         | -----KV---EVVE-----AE-----ASSYP-----                             |
| P_trichocarpa_XP_002314509         | -----KV---EVIE-----AE-----ASSYP-----                             |
| A_lyrata_XP_002885143              | -----NTDQEKKLELR-----LG-----PPG-----                             |
| aAtIAA26_At3g16500                 | -----NTDQEKKLELR-----LG-----PPG-----                             |
| A_lyrata_XP_002891672              | -----FKTEKKLELK-----LG-----PPG-----                              |
| aAtIAA18_At1g51950                 | -----FKTEKKLELK-----LG-----PPG-----                              |
| O_sativa_Os02g0228900_NP_001046357 | -----QEEEEKTLELS-----LG-----LPGGGWRAACRDKGTTHKHSIA---A           |
| P_trichocarpa_XP_002309532         | -----KASEDKKLELR-----LG-----PPG-----                             |
| P_trichocarpa_XP_002324753         | -----SSSEDRKLELR-----LG-----PPG-----                             |
| P_trichocarpa_XP_002303315         | -----SSSEDRKLELR-----LG-----PPG-----                             |
| O_sativa_Os01g0741900_NP_001044208 | -----RNAGFDGEEDKKLDLK-----LG-----LPG-----                        |
| O_sativa_Os05g0523300_NP_001056086 | -----RNTNLDADEDKLELK-----LG-----LPG-----                         |
| O_sativa_Os01g0190300_NP_001042263 | -----AAAGESGLELC-----LG-----LP-----                              |
| A_lyrata_XP_002872184              | -----MEEKRLELR-----LA-----PPC-----                               |
| aAtIAA28_At5g25890                 | -----MEEKRLELR-----LA-----PPC-----                               |
| O_sativa_Os08g0109400_NP_001060811 | -----VNSLELR-----LG-----ISSDND-----                              |
| P_patens_IAA1A_BAB71765            | -----CCREELNLNESATTLO-----LG-----PPAAVKPSGQAD-----               |
| P_patens_IAA1B_BAB71766            | -----CCREELNLNESATTLO-----LG-----PPAAVKPSGHAD-----               |
| P_patens_XP_001765051              | -----CSREELNLNESATALO-----LG-----PPAGLKPTGQSD-----               |
| A_lyrata_XP_002882951              | -----L---GL-EI-TELR-----LG-----LPGR-----                         |
| aAtIAA19_MSG2_At3g15540            | -----L---GL-EI-TELR-----LG-----LPGR-----                         |
| A_lyrata_XP_002894404              | -----L---GL-EI-TELR-----LG-----LPGD-----                         |
| aAtIAA6_SHY1_At1g52830             | -----L---AL-EI-TELR-----LG-----LPGD-----                         |
| P_trichocarpa_XP_002299626         | -----L---GL-EI-TELR-----LG-----PPGS-----                         |
| P_trichocarpa_XP_002304179         | -----L---GL-EI-TELR-----LG-----LPGS-----                         |
| A_lyrata_XP_002892874              | -----NL---GL-EI-TELR-----LG-----LPGDII-----                      |
| aAtIAA5_At1g15580                  | -----NL---GL-EI-TELR-----LG-----LPGD-I-----                      |
| A_lyrata_XP_002887832              | -----DL-GG-IELT-----LA-----LPGTP-----                            |
| aAtIAA15_At1g80390                 | -----DL-GG-TELT-----LA-----LPGTP-----                            |
| P_trichocarpa_XP_002299625         | -----V---SF-KE-TELT-----LG-----LPGES-----                        |
| O_sativa_Os01g0178500_NP_001042192 | -----L---DF-ED-TALT-----LR-----LPGSL-----                        |
| O_sativa_Os05g0178600_NP_001054800 | -----L---DF-ED-TALT-----LR-----LPGSS-----                        |
| O_sativa_Os06g0597000_NP_001057986 | -----L---DY-DD-TALT-----LA-----LPGS-----                         |
| O_sativa_Os03g0633800_NP_001050714 | -----LI---KA-T---ELR-----LG-----LPGT-----                        |
| O_sativa_Os12g0601400_NP_001067210 | -----L---KA-T---ELR-----LG-----LPGT-----                         |
| O_sativa_Os03g0797800_NP_001051565 | -----SI---DA-E---LR-----LG-----LPGS-----                         |
| O_sativa_Os07g0182400_NP_001059051 | -----ET---DA-DN-LCLR-----LG-----PPGSSITTTTT-----                 |
| P_trichocarpa_XP_002300804         | -----HL---NL-KA-TELR-----LG-----LPGSDEPEK-----                   |
| P_trichocarpa_XP_002307625         | -----DL---NL-KA-TELR-----LG-----LPGSDEPEK-----                   |
| P_trichocarpa_XP_002319642         | -----DL---NL-DA-TELR-----LG-----LPGTATKQS-----                   |
| P_trichocarpa_XP_002328339         | -----DL---NL-EA-TELR-----LG-----LPGTATEQL-----                   |
| P_trichocarpa_XP_002312567         | -----DL---NL-KE-TELR-----LG-----LPGTGCTNE-----                   |
| P_trichocarpa_XP_002314656         | -----DL---NL-KA-TELR-----LG-----LPGTSC'TNE-----                  |
| A_lyrata_XP_002870306              | -----GL---NL-KD-TELR-----LG-----LPGAQEEQ-----                    |
| aAtIAA1_AXR5_At4g14560             | -----GL---NL-KD-TELR-----LG-----LPGAQEEQ-----                    |
| A_lyrata_XP_002885542              | -----EL---NL-KD-TELC-----LG-----LPGRTEEIK-----                   |
| aAtIAA2_At3g23030                  | -----EL---NL-KD-TELC-----LG-----LPGRTEKIK-----                   |
| A_lyrata_XP_002865407              | -----LV---NL-KA-TELR-----LG-----LPGTEETVS-----                   |
| aAtIAA4_At5g43700                  | -----LV---NL-KA-TELR-----LG-----LPGTEETVS-----                   |
| A_lyrata_XP_002892202              | -----FV---NL-KE-TELR-----LG-----LPGTDNVCE-----                   |
| aAtIAA3_SHY2_At1g04240             | -----FV---NL-KE-TELR-----LG-----LPGTDNVCE-----                   |
| A_lyrata_XP_002864971              | -----KTL---KL-WD-VETGSVIKTLIGHSNYVFCANFNQSNMIVSGSFDETVR1WDVKSGKC |
| O_sativa_Os090527700_NP_001063732  | -----GV---EL---TELT-----LG-----PPGAS-----                        |
| A_lyrata_XP_002868277              | -----M---NL-KE-TELC-----LG-----LPGGA-----                        |
| aAtIAA14_SLR_At4g14550             | -----M---NL-KE-TELC-----LG-----LPGGT-----                        |
| A_lyrata_XP_002883395              | -----M---NL-KA-TELC-----LG-----LPGGA-----                        |
| aAtIAA7_AXR2_At3g23050             | -----M---NL-KA-TELC-----LG-----LPGGA-----                        |
| P_trichocarpa_XP_002311658         | -----L---NY-KE-TELC-----LG-----LPGAVG-----                       |
| A_lyrata_XP_002889499              | -----L---NL-KE-TELC-----LG-----LPGGD-----                        |
| aAtIAA17_AXR3_At1g04250            | -----L---NL-RE-TELC-----LG-----LPGGD-----                        |
| A_lyrata_XP_002884465              | -----I---NF-EA-TELR-----LG-----LPGGNH-----                       |
| aAtIAA16_At3g04730                 | -----I---NF-EA-TELR-----LG-----LPGGNH-----                       |
| P_trichocarpa_XP_002302075         | -----M---GF-EE-TELR-----LG-----LPGNGG-----                       |
| P_trichocarpa_XP_002328494         | -----I---NY-EE-TELR-----LG-----LPGGAS-----                       |
| P_trichocarpa_XP_002319075         | -----I---NF-EE-TELR-----LG-----LPGGIG-----                       |
| P_trichocarpa_XP_002306817         | -----M---RF-EE-TELR-----LG-----LPGNGG-----                       |
| O_sativa_Os03g0633500_NP_001050713 | -----L---GF-DE-TELR-----LG-----LPGAG-----                        |

|                                    |                                               |
|------------------------------------|-----------------------------------------------|
| O_sativa_Os12g0601300_NP_001067209 | --L---AF-EA-TELR-----LG-----LPGGGG-----       |
| O_sativa_Os03g0742900_NP_001051230 | --A---DV-DVGTCLR-----LG-----LPGGGG-----       |
| O_sativa_Os01g0675700_NP_001043847 | GEA---RG-PR-LTLR-----LG-----LPGSESPERE-----   |
| O_sativa_Os05g0559400_NP_001056300 | AEV---VG-AH-LALR-----LG-----LPGSESPARAEA----- |
| O_sativa_Os01g0231000_NP_001042495 | VDL---KG---TELR-----LG-----LPGSESPDRRP-----   |
| O_sativa_Os06g0335500_NP_001057554 | -----LA-TELR-----LG-----LPGTAAEEAESE-----     |
| P_trichocarpa_XP_002298231         | TSL---NM-KE-TELR-----LG-----LPGSQSPERKP-----  |
| P_trichocarpa_XP_002303297         | TSL---NL-KE-TELR-----LG-----LPGYQSPERKL-----  |
| P_trichocarpa_XP_002331172         | KGL---NL-KA-TELR-----LG-----LPGSDSPERGN-----  |
| A_lyrata_XP_002867425              | NGL---NF-KA-TELR-----LG-----LPGSESPER-----    |
| aAtIAA27_PAP2_At4g29080            | NGL---NF-KA-TELR-----LG-----LPGSESPER-----    |
| aAtIAA8_At2g22670                  | SNL---NF-KA-TELR-----LG-----LPESQSPERETD----- |
| aAtIAA9_At5g5670                   | ATI---SL-KA-TELT-----LG-----LPGSQSPARDTE----- |
| A_lyrata_XP_002864969              | ATI---SL-KA-TELT-----LG-----LPGSQSPARDTE----- |
| A_lyrata_XP_002878628              | SNL---NF-KA-TELR-----LG-----LPESQSPERETD----- |
| A_lyrata_XP_002862301              | ATI---SL-KA-TELT-----LG-----LPGSQSPARDTE----- |
| P_trichocarpa_XP_002302351         | TSL---NL-KA-TELR-----LG-----LPGSQSPERNHE----- |

[  
240]

181

|                                    |                                               |
|------------------------------------|-----------------------------------------------|
| aAtIAA29_At4g32280                 | G---TEKLRFEATFGLGN-----VEENCYMP-----          |
| P_trichocarpa_XP_002308067         | -----DKKRSFIDASEESS-----RNEDVPR-----          |
| P_trichocarpa_XP_002324639         | -----DKKRSFIDAFEESS-----GNEDGPO-----          |
| P_trichocarpa_XP_002309635         | L---DNKRSFEVAFKFN-----IKDASQ-----             |
| P_trichocarpa_XP_002300855         | -----TSATG-----                               |
| P_trichocarpa_XP_002307573         | -----TSATG-----                               |
| O_sativa_Os02g0141100_NP_001045857 | V---EMEGVDPNSNGLFG-----INNDNL-----            |
| O_sativa_Os02g0805100_NP_001048437 | -----KRGFREAFQET-----                         |
| O_sativa_Os06g0166500_NP_001056915 | S---CRKRGFEALGG-----                          |
| A_lyrata_XP_002864517              | -----DTTTPFIS-----                            |
| P_trichocarpa_XP_002324470         | -----SSVPNFMA-----                            |
| O_sativa_Os04g0653300_NP_001054106 | -----PTTSEQER-----                            |
| A_lyrata_XP_002878437              | -----NPFVSSSN-----TRN-----                    |
| aAtIAA33_At5g57420                 | -----DTTTPFIP-----                            |
| aAtIAA30_At3g62100                 | -----NPFVSSSN-----TRN-----                    |
| A_lyrata_XP_002880275              | -----NPFVSSSN-----TRN-----                    |
| aAtIAA20_At2g46990                 | -----NPFVSSSN-----TRN-----                    |
| P_trichocarpa_XP_002302809         | -----SVSGESSFPH-----VKRD-----                 |
| P_trichocarpa_XP_002320253         | -----SVSKSSLQ-----LKKD-----                   |
| O_sativa_Os01g0286900_NP_001042778 | -----GLASR-----RR-----                        |
| O_sativa_Os02g0723400_NP_001047972 | -----CRPPATAAK-----RRSL-----                  |
| A_lyrata_XP_002885218              | -----TKPSPSESS-----                           |
| aAtIAA31_At3g17600                 | -----TKPSPSESS-----                           |
| O_sativa_Os11g0221300_NP_001067526 | -----GGVIDLG-----LSLS-----                    |
| A_lyrata_XP_002875064              | -----GGVIDLG-----LSLR-----                    |
| aAtIAA32_MEE10_At2g01200           | -----GGVIDLG-----LSLR-----                    |
| aAtIAA34_At1g15050                 | -----GGVIDLG-----LSLR-----                    |
| A_lyrata_XP_002892847              | -----GGVIDLG-----LSLR-----                    |
| P_trichocarpa_XP_002314837         | -----DGIIDLG-----LSLR-----                    |
| A_lyrata_XP_002869489              | V---GNELELGLTSLG-----PKG-----YRDC-----        |
| aAtIAA11_At4g28640                 | I---GNELELGLTSLG-----RKG-----YRDC-----        |
| P_trichocarpa_XP_002303110         | D---EGELELGLSLGG-----ASG-----FKDFQORSS-----   |
| O_sativa_Os02g0817600_NP_001048522 | D---DEELELGLSLGSK-----KQ-----QQQOHAP-----     |
| A_lyrata_XP_002889491              | S---ETELDLALGLSIGL-----KG-----RRKVRS-----     |
| aAtIAA10_At1g04100                 | S---ETELDLALGLSIG-----RRKVRS-----             |
| A_lyrata_XP_002881274              | L---GGGTAAKIGKSGG-----GG-----AWGERG-----      |
| aAtIAA13_At2g33310                 | L---GGGTAAKIGKSGG-----GG-----AWGERG-----      |
| A_lyrata_XP_002889513              | A---ESELELGLGLSLG-----GG-----AWKERG-----      |
| aAtIAA12_BDL_At1g04550             | A---ESELELGLGLSLG-----GG-----AWKERG-----      |
| P_trichocarpa_XP_002311698         | V---EAELELGLSLGSGGRG-----GGGGGKGANARGERG----- |
| P_trichocarpa_XP_002314509         | V---EAELELGLGLSLG-----SGGGGKGANAWGECG-----    |
| A_lyrata_XP_002885143              | -----GDEEDHSAIK-----KKNTE-----                |
| aAtIAA26_At3g16500                 | -----GDEEDHSAIK-----KKNTE-----                |
| A_lyrata_XP_002891672              | -----EEDDDSSI-----                            |
| aAtIAA18_At1g51950                 | -----EEDDES-M-----                            |
| O_sativa_Os02g0228900_NP_001046357 | A---AAADDDGDKSSML-----SLGYS-----              |
| P_trichocarpa_XP_002309532         | -----E-ISLVYKTN-----PT-----                   |
| P_trichocarpa_XP_002324753         | -----EDWSLKSTSN-----RERRERHKS-----            |
| P_trichocarpa_XP_002303315         | -----FIEDDEAETLRD-----YRLQQ-ES-----           |
| O_sativa_Os01g0741900_NP_001044208 | -----VQOEERAADSRE-----KIQQQQRES-----          |
| O_sativa_Os05g0523300_NP_001056086 | -----AYFSSSSSS-----                           |
| O_sativa_Os01g0190300_NP_001042263 | -----HTAM-----                                |
| A_lyrata_XP_002872184              | -----                                         |

```

aAtIAA28_At5g25890 -----H---QFTSN-----
O_sativa_Os08g0109400_NP_001060811 -----QISGGGAASP-----WLGVG-----
P_patens_IAA1A_BAB71765 G----DDAHDEGAGPENPAKRSAHYHMQQESLADGRKAAAEMGSFKIQRKNILEEFRAMKA
P_patens_IAA1B_BAB71766 G----ADAHDEGAGPENPAKRPAHHMQQESLADGRKAAAEMGSFKIQRKNILEEFRAMKA
P_patens_XP_001765051 V----VLAEAAAAGPENPAKRPAHYHLQQNSTVDVKKPVAEAVSTKNQRK-IIEEFRAKKA
A_lyrata_XP_002882951 -----DVAEK-----MIK-----
aAtIAA19_MSG2_At3g15540 -----DVAEK-----MMK-----
A_lyrata_XP_002894404 -----NYSEISIW-----GS-KNK-----
aAtIAA6_SHY1_At1g52830 -----NYSEISVC-----GSSKKK-----
P_trichocarpa_XP_002299626 -----ENGPKE-----NEK-----
P_trichocarpa_XP_002304179 -----DDGHE-----NDK-----
A_lyrata_XP_002892874 -----VVSGQS-----ILGK-----
aAtIAA5_At1g15580 -----VVSGES-----ISGK-----
A_lyrata_XP_002887832 -----TNASDGPKE-----KCRN-----
aAtIAA15_At1g80390 -----TNASEGPK-----KFGN-----
P_trichocarpa_XP_002299625 -----RGLALIEK-----TSG-----
O_sativa_Os01g0178500_NP_001042192 -----AAAAADP-----DRK-----
O_sativa_Os05g0178600_NP_001054800 -----SSSSSSSS-----SSS-----
O_sativa_Os06g0597000_NP_001057986 -----SSSSSSSTA-----DPE-----
O_sativa_Os03g0633800_NP_001050714 -----ADDLPS-----TPRGK-----
O_sativa_Os12g0601400_NP_001067210 -----EEEEAP-----PP-ST-----
O_sativa_Os03g0797800_NP_001051565 -----GGGDGVAAK-----KRRSA-----
O_sativa_Os07g0182400_NP_001059051 -----TGGADPAK-----RSLGA-----
P_trichocarpa_XP_002300804 -----PSTTPS-----VRSN-----
P_trichocarpa_XP_002307625 -----PSTTPS-----VRSN-----
P_trichocarpa_XP_002319642 -----EKQTPNSN-----LAKSN-----
P_trichocarpa_XP_002328339 -----EKQTPNSN-----VTKSN-----
P_trichocarpa_XP_002312567 -----KGVSG-----ARNN-----
P_trichocarpa_XP_002314656 -----EQAVSG-----ARNN-----
A_lyrata_XP_002870306 -----QQEVS-----CVRSN-----
aAtIAA1_AXR5_At4g14560 -----QLELS-----CVRSN-----
A_lyrata_XP_002885542 -----EEQEV-----CVKSN-----
aAtIAA2_At3g23030 -----EEQEV-----CVKSN-----
A_lyrata_XP_002865407 -----CGKSN-----
aAtIAA4_At5g43700 -----CGKSN-----
A_lyrata_XP_002892202 -----EKESIISC-----CNNNN-----
aAtIAA3_SHY2_At1g04240 -----AKER-VSC-----CNNNN-----
A_lyrata_XP_002864971 L----KVLPAHSVP-VTC-----VDFNR-----
O_sativa_Os090527700_NP_001063732 -----ARR-ARR-----GRKN-----
A_lyrata_XP_002868277 -----ETVECPKS-----GVGN-----
aAtIAA14_SLR_At4g14550 -----ETVESPAKS-----GVGN-----
A_lyrata_XP_002883395 -----EAVESPAKS-----AVGS-----
aAtIAA7_AXR2_At3g23050 -----EAVESPAKS-----AVGS-----
P_trichocarpa_XP_002311658 -----AKNEVETPNK-----ATG-----
A_lyrata_XP_002889499 -----TVAPVT-----GN-----
aAtIAA17_AXR3_At1g04250 -----TVAPVT-----GN-----
A_lyrata_XP_002884465 -----G---GEMVGKY-----N-G-----
aAtIAA16_At3g04730 -----G---GEMAGKN-----N-G-----
P_trichocarpa_XP_002302075 -----G-AEG-EMVR-----
P_trichocarpa_XP_002328494 -----NGNDG-EAAKG-----N-G-----
P_trichocarpa_XP_002319075 -----NGNDG-EVAKS-----N-G-----
P_trichocarpa_XP_002306817 -----GGTEGGEFAR-----
O_sativa_Os03g0633500_NP_001050713 -----ELAARS-----S-G-----
O_sativa_Os12g0601300_NP_001067209 -----DGDAAAAAARS-----SSG-----
O_sativa_Os03g0742900_NP_001051230 -----GAAEAAA-----KAA-----
O_sativa_Os01g0675700_NP_001043847 -----VVAAGLTLG-----PLPPTTT-----KAAS-----
O_sativa_Os05g0559400_NP_001056300 E----AVVVDAAALTLG-----PAPPP-----RGGA-----
O_sativa_Os01g0231000_NP_001042495 -----AAIAAAAATAT-----TLELLP-----AKGA-----
O_sativa_Os06g0335500_NP_001057554 -----GGGGGGTDAAP-----LTLELLP-----KGA-----
P_trichocarpa_XP_002298231 -----TVPAAGVSLVGKIDTNNNTNAYS LIP-VKNLVSGA-----
P_trichocarpa_XP_002303297 -----TLPAAGVSLFGKIDTNNNTNGYPLRP-LKNLVSGT-----
P_trichocarpa_XP_002331172 -----ENQQLGFSLN-----NNNSKD-----KSFVSGA-----
A_lyrata_XP_002867425 -----VDSRFLALN-----KSSCP-----VSGA-----
aAtIAA27_PAP2_At4g29080 -----VDSRFLALN-----KSSCP-----VSGA-----
aAtIAA8_At2g22670 F----GLLSPRTPEKLLFPLLPSKDNGSATTGHKNVSGN-----
aAtIAA9_At5g65670 L----NLLSPAKLDEKPFPLLPSKDEICSSS-QKNNASGN-----
A_lyrata_XP_002864969 L----NLLSPAKLDEKPFPLLPSKDEICSSS-QKNNASGN-----
A_lyrata_XP_002878628 F----GLLSPRTLDEKLLFPLLPCDNTSATTGHKNVSGN-----
A_lyrata_XP_002862301 L----NLLSPAKLDEKPFPLLPSKDEICSSS-QKNNASGN-----
P_trichocarpa_XP_002302351 L----SLLSSALLDEKPFPLHPSNDGHYSST-QKNVSGN-----

```

|                                    |                                                         |
|------------------------------------|---------------------------------------------------------|
| aAtIAA29_At4g32280                 | -----KQR-----LFALNG--Q                                  |
| P_trichocarpa_XP_002308067         | -----TLP-----LLVWNN--Q                                  |
| P_trichocarpa_XP_002324639         | -----TLP-----LLVWNN--Q                                  |
| P_trichocarpa_XP_002309635         | -----ELP-----LLLWSG--Q                                  |
| P_trichocarpa_XP_002300855         | -----                                                   |
| P_trichocarpa_XP_002307573         | -----                                                   |
| O_sativa_Os02g0141100_NP_001045857 | -----LGFPIETED                                          |
| O_sativa_Os02g0805100_NP_001048437 | -----LLL--D                                             |
| O_sativa_Os06g0166500_NP_001056915 | -----FKT--D                                             |
| A_lyrata_XP_002864517              | -----KPASK-----NHN--N                                   |
| P_trichocarpa_XP_002324470         | -----KPIT-----                                          |
| O_sativa_Os04g0653300_NP_001054106 | -----RQKQ-----HR--G                                     |
| A_lyrata_XP_002878437              | -----L--ST--D                                           |
| aAtIAA33_At5g57420                 | -----KPASK-----NHN--N                                   |
| aAtIAA30_At3g62100                 | -----L--ST--D                                           |
| A_lyrata_XP_002880275              | -----L--ST--D                                           |
| aAtIAA20_At2g46990                 | -----L--ST--D                                           |
| P_trichocarpa_XP_002302809         | -----L--ST--D                                           |
| P_trichocarpa_XP_002320253         | -----L--ST--D                                           |
| O_sativa_Os01g0286900_NP_001042778 | -----                                                   |
| O_sativa_Os02g0723400_NP_001047972 | -----I--ST--D                                           |
| A_lyrata_XP_002885218              | -----V--N                                               |
| aAtIAA31_At3g17600                 | -----V--N                                               |
| O_sativa_Os11g0221300_NP_001067526 | -----                                                   |
| A_lyrata_XP_002875064              | -----TIQHETYLP                                          |
| aAtIAA32_MEE10_At2g01200           | -----TIQHETYLP                                          |
| aAtIAA34_At1g15050                 | -----TIQHEIYHS                                          |
| A_lyrata_XP_002892847              | -----TIQHEIYHT                                          |
| P_trichocarpa_XP_002314837         | -----TLKPEAYHP                                          |
| A_lyrata_XP_002869489              | -----RVSYAD--D                                          |
| aAtIAA11_At4g28640                 | -----RV--YAD--D                                         |
| P_trichocarpa_XP_002303110         | -----Q-----QYA-----RILTAK--D                            |
| O_sativa_Os02g0817600_NP_001048522 | -----C-----RILTAK--D                                    |
| A_lyrata_XP_002889491              | -----SLSSSS--S                                          |
| aAtIAA10_At1g04100                 | -----SLSSSS--S                                          |
| A_lyrata_XP_002881274              | -----RLLTAK--D                                          |
| aAtIAA13_At2g33310                 | -----RLLTAK--D                                          |
| A_lyrata_XP_002889513              | -----RILTAK--D                                          |
| aAtIAA12_BDL_At1g04550             | -----RILTAK--D                                          |
| P_trichocarpa_XP_002311698         | -----RILTAK--D                                          |
| P_trichocarpa_XP_002314509         | -----RILTAK--D                                          |
| A_lyrata_XP_002885143              | -----TRNIKKE                                            |
| aAtIAA26_At3g16500                 | -----IRNIKKE                                            |
| A_lyrata_XP_002891672              | -----IRHIKKE                                            |
| aAtIAA18_At1g51950                 | -----IRHMKKE                                            |
| O_sativa_Os02g0228900_NP_001046357 | -----T-----LVSHSQGKA                                    |
| P_trichocarpa_XP_002309532         | -----                                                   |
| P_trichocarpa_XP_002324753         | -----                                                   |
| P_trichocarpa_XP_002303315         | -----QL-----LSFG-----YFTNGNQOT                          |
| O_sativa_Os01g0741900_NP_001044208 | -----PS-----LSLS-----FFPKHSKTT                          |
| O_sativa_Os05g0523300_NP_001056086 | -----SSE-----PSIG-----CFPTHSKPT                         |
| O_sativa_Os01g0190300_NP_001042263 | -----                                                   |
| A_lyrata_XP_002872184              | -----NHV---                                             |
| aAtIAA28_At5g25890                 | -----NNINGS                                             |
| O_sativa_Os08g0109400_NP_001060811 | -----V-----HPWSLAARQ                                    |
| P_patens_IAA1A_BAB71765            | HAHMTKSPKTVQTMQHNMHVSYSGAQMAFGGAKNNGVK-----RVFSEAVVA    |
| P_patens_IAA1B_BAB71766            | QAHMTKSPKPVHTMQHNMHASFSGAQMAFGGAKNNGVK-----RVFSEAVGG    |
| P_patens_XP_001765051              | ---AQD---AKAMQSMQHNVVRASYPGAQSVFPGAKNNGVK-----RGFSEAVGT |
| A_lyrata_XP_002882951              | -----K-----RAFTEMNMT                                    |
| aAtIAA19_MSG2_At3g15540            | -----K-----RAFTEMNMT                                    |
| A_lyrata_XP_002894404              | -----K-----RVLSDM--MT                                   |
| aAtIAA6_SHY1_At1g52830             | -----K-----RVLSDM--MT                                   |
| P_trichocarpa_XP_002299626         | -----K-----RVFSEL---                                    |
| P_trichocarpa_XP_002304179         | -----K-----RVFSEV---                                    |
| A_lyrata_XP_002892874              | -----K-----RASPEV---                                    |
| aAtIAA5_At1g15580                  | -----K-----RASPEV---                                    |
| A_lyrata_XP_002887832              | -----K-----RRFLET--VD                                   |
| aAtIAA15_At1g80390                 | -----K-----RRFLET--VD                                   |
| P_trichocarpa_XP_002299625         | -----K-----RGFLET--VD                                   |
| O_sativa_Os01g0178500_NP_001042192 | -----RSSPSS--SD                                         |
| O_sativa_Os05g0178600_NP_001054800 | -----SSSPSE--PD                                         |
| O_sativa_Os06g0597000_NP_001057986 | -----RKRAAH--AD                                         |
| O_sativa_Os03g0633800_NP_001050714 | -----K-----RAAAAE--D-                                   |

|                                    |                                                     |
|------------------------------------|-----------------------------------------------------|
| O_sativa_Os12g0601400_NP_001067210 | -----P-----RAGSK----                                |
| O_sativa_Os03g0797800_NP_001051565 | -----S-----STVKSE-AS                                |
| O_sativa_Os07g0182400_NP_001059051 | -----K-----RSLEST-DS                                |
| P_trichocarpa_XP_002300804         | -----K-----RASPEI-SE                                |
| P_trichocarpa_XP_002307625         | -----K-----RASPEI-SE                                |
| P_trichocarpa_XP_002319642         | -----K-----RSLPDM-NE                                |
| P_trichocarpa_XP_002328339         | -----K-----RSLPDM-NE                                |
| P_trichocarpa_XP_002312567         | -----K-----RPFPET-RE                                |
| P_trichocarpa_XP_002314656         | -----K-----RPLPET-RE                                |
| A_lyrata_XP_002870306              | -----N-----KRKNND-SK                                |
| aAtIAA1_AXR5_At4g14560             | -----N-----KRKNND-ST                                |
| A_lyrata_XP_002885542              | -----N-----KRQFED-TR                                |
| aAtIAA2_At3g23030                  | -----N-----KRLFEE-TR                                |
| A_lyrata_XP_002865407              | -----K-----RALLDD-TE                                |
| aAtIAA4_At5g43700                  | -----K-----RVLPEA-TE                                |
| A_lyrata_XP_002892202              | -----K-----RALSSD-NE                                |
| aAtIAA3_SHY2_At1g04240             | -----K-----RVLSTP-TE                                |
| A_lyrata_XP_002864971              | -----D-----DGLSIVSSSYDGLCRIWDSGTGHCVK-----TLIDDE-NP |
| O_sativa_Os090527700_NP_001063732  | -----K-----RGFSET-VG                                |
| A_lyrata_XP_002868277              | -----K-----RGFSET-VD                                |
| aAtIAA14_SLR_At4g14550             | -----K-----RGFSET-VD                                |
| A_lyrata_XP_002883395              | -----K-----RGFSET-VD                                |
| aAtIAA7_AXR2_At3g23050             | -----K-----RGFSET-VD                                |
| P_trichocarpa_XP_002311658         | -----K-----RGFAET-VD                                |
| A_lyrata_XP_002889499              | -----K-----RGFSET-VD                                |
| aAtIAA17_AXR3_At1g04250            | -----K-----RGFSET-VD                                |
| A_lyrata_XP_002884465              | -----K-----RGFSET-VD                                |
| aAtIAA16_At3g04730                 | -----K-----RGFSET-VD                                |
| P_trichocarpa_XP_002302075         | -----K-----RGFSET-VD                                |
| P_trichocarpa_XP_002328494         | -----K-----RGFSET-VD                                |
| P_trichocarpa_XP_002319075         | -----K-----RGFSET-VD                                |
| P_trichocarpa_XP_002306817         | -----K-----RGFSET-VD                                |
| O_sativa_Os03g0633500_NP_001050713 | -----K-----RGFAET-ID                                |
| O_sativa_Os12g0601300_NP_001067209 | -----K-----RGFAET-ID                                |
| O_sativa_Os03g0742900_NP_001051230 | -----K-----RGFEET-ID                                |
| O_sativa_Os01g0675700_NP_001043847 | -----K-----RAFPPS-SP                                |
| O_sativa_Os05g0559400_NP_001056300 | -----K-----RGFVDS-LD                                |
| O_sativa_Os01g0231000_NP_001042495 | -----K-----RVFPDE-AA                                |
| O_sativa_Os06g0335500_NP_001057554 | -----K-----RGFADA-IV                                |
| P_trichocarpa_XP_002298231         | -----K-----RVFSDA-ID                                |
| P_trichocarpa_XP_002303297         | -----K-----RGFSDA-IV                                |
| P_trichocarpa_XP_002331172         | -----R-----RGFSVA-IH                                |
| A_lyrata_XP_002867425              | -----K-----RVFSDA-IN                                |
| aAtIAA27_PAP2_At4g29080            | -----K-----RVFSDA-IN                                |
| aAtIAA8_At2g22670                  | -----K-----RGFADT-WD                                |
| aAtIAA9_At5g65670                  | -----K-----RGFSDT-MD                                |
| A_lyrata_XP_002864969              | -----K-----RGFSDT-MD                                |
| A_lyrata_XP_002878628              | -----K-----RGFADT-WD                                |
| A_lyrata_XP_002862301              | -----K-----RGFSDT-MD                                |
| P_trichocarpa_XP_002302351         | -----K-----RVFSDA-MD                                |

[  
360]

301

|                                    |                 |
|------------------------------------|-----------------|
| aAtIAA29_At4g32280                 | P-----          |
| P_trichocarpa_XP_002308067         | P-----          |
| P_trichocarpa_XP_002324639         | P-----          |
| P_trichocarpa_XP_002309635         | P-----          |
| P_trichocarpa_XP_002300855         | -----           |
| P_trichocarpa_XP_002307573         | -----           |
| O_sativa_Os02g0141100_NP_001045857 | LLINALDSVK----- |
| O_sativa_Os02g0805100_NP_001048437 | -----           |
| O_sativa_Os06g0166500_NP_001056915 | D-----          |
| A_lyrata_XP_002864517              | S-----          |
| P_trichocarpa_XP_002324470         | -----           |
| O_sativa_Os04g0653300_NP_001054106 | -----           |
| A_lyrata_XP_002878437              | -----           |
| aAtIAA33_At5g57420                 | S-----          |
| aAtIAA30_At3g62100                 | -----           |
| A_lyrata_XP_002880275              | -----           |
| aAtIAA20_At2g46990                 | -----           |
| P_trichocarpa_XP_002302809         | -----           |
| P_trichocarpa_XP_002320253         | -----           |
| O_sativa_Os01g0286900_NP_001042778 | -----           |

```

O_sativa_Os02g0723400_NP_001047972 -----
A_lyrata_XP_002885218 -----
aAtIAA31_At3g17600 -----
O_sativa_Os11g0221300_NP_001067526 -----
A_lyrata_XP_002875064 P-----
aAtIAA32_MEE10_At2g01200 P-----
aAtIAA34_At1g15050 -----
A_lyrata_XP_002892847 -----
P_trichocarpa_XP_002314837 -----
A_lyrata_XP_002869489 -----
aAtIAA11_At4g28640 -----
P_trichocarpa_XP_002303110 LPSKVSSSSCC-----
O_sativa_Os02g0817600_NP_001048522 LQP-----AAA-----
A_lyrata_XP_002889491 SS-----
aAtIAA10_At1g04100 S-----
A_lyrata_XP_002881274 -----
aAtIAA13_At2g33310 -----
A_lyrata_XP_002889513 -----
aAtIAA12_BDL_At1g04550 -----
P_trichocarpa_XP_002311698 -----
P_trichocarpa_XP_002314509 -----
A_lyrata_XP_002885143 -----
aAtIAA26_At3g16500 -----
A_lyrata_XP_002891672 -----
aAtIAA18_At1g51950 -----
O_sativa_Os02g0228900_NP_001046357 -----
P_trichocarpa_XP_002309532 -----
P_trichocarpa_XP_002324753 -----
P_trichocarpa_XP_002303315 -----
O_sativa_Os01g0741900_NP_001044208 -----
O_sativa_Os05g0523300_NP_001056086 -----
O_sativa_Os01g0190300_NP_001042263 -----
A_lyrata_XP_002872184 -----
aAtIAA28_At5g25890 -----
O_sativa_Os08g0109400_NP_001060811 G-----
P_patens_IAA1A_BAB71765 NHNAASGVGVGVREGNDDVSRCEEMNGTEQLDLKVHLPKGMGMARMAPVSGQNGSAWRN-----
P_patens_IAA1B_BAB71766 NHIAASGVGVGVREGNDDVSRCEEMNGTEQLDLKVHLPKGMGMARMAPVSGQNGSAWRN-----
P_patens_XP_001765051 NFNASSGAGGAVREGNCDMNRGEGVGGTEQPESKVNHLQSMGMSRMAPGSGGQNGSAWRN-----
A_lyrata_XP_002882951 S-----
aAtIAA19_MSG2_At3g15540 S-----
A_lyrata_XP_002894404 S-----
aAtIAA6_SHY1_At1g52830 S-----
P_trichocarpa_XP_002299626 -----
P_trichocarpa_XP_002304179 -----
A_lyrata_XP_002892874 -----
aAtIAA5_At1g15580 -----
A_lyrata_XP_002887832 LKLG-----
aAtIAA15_At1g80390 LKLG-----
P_trichocarpa_XP_002299625 LNLGRS-----SN-----
O_sativa_Os01g0178500_NP_001042192 -----A-----
O_sativa_Os05g0178600_NP_001054800 RKRA-----SA-----
O_sativa_Os06g0597000_NP_001057986 -----
O_sativa_Os03g0633800_NP_001050714 -----N-----
O_sativa_Os12g0601400_NP_001067210 -----
O_sativa_Os03g0797800_NP_001051565 -----
O_sativa_Os07g0182400_NP_001059051 M-----A-----
P_trichocarpa_XP_002300804 E-----S-----
P_trichocarpa_XP_002307625 E-----S-----
P_trichocarpa_XP_002319642 E-----P-----
P_trichocarpa_XP_002328339 D-----S-----
P_trichocarpa_XP_002312567 E-----G-----
P_trichocarpa_XP_002314656 E-----R-----
A_lyrata_XP_002870306 -----
aAtIAA1_AXR5_At4g14560 -----
A_lyrata_XP_002885542 E-----
aAtIAA2_At3g23030 D-----
A_lyrata_XP_002865407 K-----E-----
aAtIAA4_At5g43700 K-----E-----
A_lyrata_XP_002892202 K-----E-----
aAtIAA3_SHY2_At1g04240 K-----E-----
A_lyrata_XP_002864971 PVSFVKFSPNGKFILIGTLDNKL-----EETDHGRA-----
O_sativa_Os090527700_NP_001063732 -----
A_lyrata_XP_002868277 LKLNLO-----SN-----

```

aAtIAA14\_SLR\_At4g14550  
A\_lyrata\_XP\_002883395  
aAtIAA7\_AXR2\_At3g23050  
P\_trichocarpa\_XP\_002311658  
A\_lyrata\_XP\_002889499  
aAtIAA17\_AXR3\_At1g04250  
A\_lyrata\_XP\_002884465  
aAtIAA16\_At3g04730  
P\_trichocarpa\_XP\_002302075  
P\_trichocarpa\_XP\_002328494  
P\_trichocarpa\_XP\_002319075  
P\_trichocarpa\_XP\_002306817  
O\_sativa\_Os03g0633500\_NP\_001050713  
O\_sativa\_Os12g0601300\_NP\_001067209  
O\_sativa\_Os03g0742900\_NP\_001051230  
O\_sativa\_Os01g0675700\_NP\_001043847  
O\_sativa\_Os05g0559400\_NP\_001056300  
O\_sativa\_Os01g0231000\_NP\_001042495  
O\_sativa\_Os06g0335500\_NP\_001057554  
P\_trichocarpa\_XP\_002298231  
P\_trichocarpa\_XP\_002303297  
P\_trichocarpa\_XP\_002331172  
A\_lyrata\_XP\_002867425  
aAtIAA27\_PAP2\_At4g29080  
aAtIAA8\_At2g22670  
aAtIAA9\_At5g65670  
A\_lyrata\_XP\_002864969  
A\_lyrata\_XP\_002878628  
A\_lyrata\_XP\_002862301  
P\_trichocarpa\_XP\_002302351

LKLNLO-----SN-----  
LMLNLO-----SN-----  
LMLNLO-----SN-----  
LKLNLO-----A-----  
LKLNLNNEP-----EN-----  
LKLNLNNEP-----AN-----  
LKLNLS-----S-----  
LKLNLS-----S-----  
LKLKLS-----S-----  
LKLNLS-----T-----  
LKLNLS-----T-----  
LKLNLS-----S-----  
LKLKLPAA-----PAAVSG-----  
LKLKLEPAA-----AAVDDDDDK-----  
LKLKLPAG-----  
RH-----GASS-----  
R-----SE-----  
LTPP-----TAAA-----  
-----G-----  
GSTGKWFVSG-----GDNGNPQKSRVA-----  
GSSGKWFVSGSNGSEVDLKGKAILFSPRGDNGNSQKSCVA-----  
GGSANWVFSG-----NAGSDPNFSLRG-----  
-ESNKWIFST-----GSTTATGDVGS-----  
-DSNKWVFSF-----GSTTATGDVGS-----  
EFSGVKGSVRPGG-----G-----INMMLS-----  
QFAEAKSSVYTE-----KNWMFP-----  
QFAEAKSSVYTE-----KNWMFP-----  
EFSGLKGSVRPGG-----INMMLS-----  
QFAEAKSSVYTE-----KNWMFP-----  
EFSESKFLSNSE-----VNAMLSRPPSPNMGKPKGMLENLGV-----

[  
420]

361

aAtIAA29\_At4g32280  
P\_trichocarpa\_XP\_002308067  
P\_trichocarpa\_XP\_002324639  
P\_trichocarpa\_XP\_002309635  
P\_trichocarpa\_XP\_002300855  
P\_trichocarpa\_XP\_002307573  
O\_sativa\_Os02g0141100\_NP\_001045857  
O\_sativa\_Os02g0805100\_NP\_001048437  
O\_sativa\_Os06g0166500\_NP\_001056915  
A\_lyrata\_XP\_002864517  
P\_trichocarpa\_XP\_002324470  
O\_sativa\_Os04g0653300\_NP\_001054106  
A\_lyrata\_XP\_002878437  
aAtIAA33\_At5g57420  
aAtIAA30\_At3g62100  
A\_lyrata\_XP\_002880275  
aAtIAA20\_At2g46990  
P\_trichocarpa\_XP\_002302809  
P\_trichocarpa\_XP\_002320253  
O\_sativa\_Os01g0286900\_NP\_001042778  
O\_sativa\_Os02g0723400\_NP\_001047972  
A\_lyrata\_XP\_002885218  
aAtIAA31\_At3g17600  
O\_sativa\_Os11g0221300\_NP\_001067526  
A\_lyrata\_XP\_002875064  
aAtIAA32\_MEE10\_At2g01200  
aAtIAA34\_At1g15050  
A\_lyrata\_XP\_002892847  
P\_trichocarpa\_XP\_002314837  
A\_lyrata\_XP\_002869489  
aAtIAA11\_At4g28640  
P\_trichocarpa\_XP\_002303110  
O\_sativa\_Os02g0817600\_NP\_001048522  
A\_lyrata\_XP\_002889491  
aAtIAA10\_At1g04100  
A\_lyrata\_XP\_002881274  
aAtIAA13\_At2g33310  
A\_lyrata\_XP\_002889513  
aAtIAA12\_BDL\_At1g04550  
P\_trichocarpa\_XP\_002311698

-----NEEDE-----DPLESES-----  
-----NEEDDP-----KDLDNHCNYS-----  
-----NEDDFP-----KDLDNHSSNS-----  
-----NEDD-----WNGEKKIS-----  
-----SDIPLT-----  
-----SDIPLN-----  
-----YQNHISTDV-----ENNYPMQKDAL-----  
-----DG-----SCCN-----  
-----DNDDG-----NGRGGDG-----  
-----NSSSE-----AAGRSFQG-----  
-----FPG-----  
-----KMLR-----  
-----LRLG-----LSFGSS-----  
-----NSSSG-----AAGRSFQG-----  
-----LRLG-----LSFGSS-----  
-----LRLG-----LSFGKS-----  
-----LRLG-----LSFGTS-----  
-----LRLG-----LGISTS-----  
-----LRLG-----LSISTS-----  
-----LRLG-----LTLSSV-----  
-----LSLS-----LTFPST-----  
-----LSLS-----LTFPST-----  
-----ARVIGLDG-----YGELIDWSQ-----  
-----ARMIGLDG-----YGELIDWSQ-----  
-----SSSSSSSSSS-----LSRASVIAGI-----  
-----SSSSSSSS-----LSRASVIAGI-----  
-----SSTSSSSST-----LSRANATAGT-----  
-----LSPDSSVSS-----SPAAAAAAGG-----  
-----MTRESGT-----KRSADSS-----  
-----LTRESGT-----KRSADSS-----  
-----FPSVGS-----KRAADSA-----  
-----FPSVGS-----KRAADSA-----  
-----FPSVGS-----KRSAESS-----  
-----FPSVGS-----KRSAESS-----  
-----FPSV-----RAADSV-----

|                                    |                                                       |
|------------------------------------|-------------------------------------------------------|
| P_trichocarpa_XP_002314509         | -----FPSV-----RAADSV-----                             |
| A_lyrata_XP_002885143              | -----TEDKSFHCF-----NGNHFSSS-----                      |
| aAtIAA26_At3g16500                 | -----TEDKSFHCF-----NGNHFSPS-----                      |
| A_lyrata_XP_002891672              | -----PKDKSILSL-----AGKHFSPPS-----                     |
| aAtIAA18_At1g51950                 | -----PKDKSILSL-----AGKYFSPPS-----                     |
| O_sativa_Os02g0228900_NP_001046357 | -----NKNKGSPEE-----EEAHPPPATG-----                    |
| P_trichocarpa_XP_002309532         | -----LEHTVGAKP-----SEGYWFTD-----                      |
| P_trichocarpa_XP_002324753         | -----HKFPSSAEN-----SHVWFNKKQOGKVPVPSYLNFPSSSTPPTATATQ |
| P_trichocarpa_XP_002303315         | -----SSTTTTTGA-----KRGFIDTVEDKTEGYNDQKQARAGCGKELAVE   |
| O_sativa_Os01g0741900_NP_001044208 | -----TSIG-TTGA-----KRGFFAIVGATLEGYN-QSHRDTEECGKELTLG  |
| O_sativa_Os05g0523300_NP_001056086 | -----TAAPAFALR-----SNGTNASK-----                      |
| O_sativa_Os01g0190300_NP_001042263 | -----TIYL-----                                        |
| A_lyrata_XP_002872184              | -----KQKSSTK-----ETSFLSNN-----                        |
| aAtIAA28_At5g25890                 | -----KAALQAHQ-----RPNECAVQRE-----                     |
| O_sativa_Os08g0109400_NP_001060811 | -----SFDNMQGPLNPFPRKSLVSKMPVDPGGDSSANASN-----         |
| P_patens_IAA1A_BAB71765            | -----LSFDNMQGPLNPFPRKSLVSKMPVDPGGDSSANASN-----        |
| P_patens_IAA1B_BAB71766            | -----INLEKMQGPLSTIFRKSLSMKSITLQDAGDSSIKCSS-----       |
| P_patens_XP_001765051              | -----SGSNSDQC-----ESGVVSSG-----                       |
| A_lyrata_XP_002882951              | -----SGSNSDQC-----ESGVVSSG-----                       |
| aAtIAA19_MSG2_At3g15540            | -----SSLNTE-N-----ENGVVSSA-----                       |
| A_lyrata_XP_002894404              | -----SALDTE-N-----ENSVVSSV-----                       |
| aAtIAA6_SHY1_At1g52830             | -----SGEANST-----                                     |
| P_trichocarpa_XP_002299626         | -----SGEANST-----                                     |
| P_trichocarpa_XP_002304179         | -----ESNMKC-----                                      |
| A_lyrata_XP_002892874              | -----EIDLKC-----                                      |
| aAtIAA5_At1g15580                  | -----EGHENKY-----FSSLITN-----                         |
| A_lyrata_XP_002887832              | -----EAHENNY-----ISSMVTN-----                         |
| aAtIAA15_At1g80390                 | -----VSDHKNKY-----SGESETDVP-----                      |
| P_trichocarpa_XP_002299625         | -----ADAADNSS-----PLAAAADA-----                       |
| O_sativa_Os01g0178500_NP_001042192 | -----TDDDPDNR-----LGSTATES-----                       |
| O_sativa_Os05g0178600_NP_001054800 | -----HADAK-----                                       |
| O_sativa_Os06g0597000_NP_001057986 | -----NA-----NAAAADDDE-----                            |
| O_sativa_Os03g0633800_NP_001050714 | -----RALAGEPDQ-----                                   |
| O_sativa_Os12g0601400_NP_001067210 | -----AC-----CGGAGARDV-----                            |
| O_sativa_Os03g0797800_NP_001051565 | -----SG-----TGTSAAAGDE-----                           |
| O_sativa_Os07g0182400_NP_001059051 | -----RS---KGS-----SSLSSN-VE-----                      |
| P_trichocarpa_XP_002300804         | -----RS---KGS-----SSVSSN-VE-----                      |
| P_trichocarpa_XP_002307625         | -----AGSSRENS-----STVSSNDKK-----                      |
| P_trichocarpa_XP_002319642         | -----AG---RRES-----SSVSSNDKK-----                     |
| P_trichocarpa_XP_002328339         | -----GA---NGK-----S---DAQ-HD-----                     |
| P_trichocarpa_XP_002312567         | -----GA---KGK-----S---DPR-HD-----                     |
| P_trichocarpa_XP_002314656         | -----                                                 |
| A_lyrata_XP_002870306              | -----                                                 |
| aAtIAA1_AXR5_At4g14560             | -----                                                 |
| A_lyrata_XP_002885542              | -----                                                 |
| aAtIAA2_At3g23030                  | -----                                                 |
| A_lyrata_XP_002865407              | -----IE---S-----TG-----                               |
| aAtIAA4_At5g43700                  | -----IE---S-----TG-----                               |
| A_lyrata_XP_002892202              | -----NE---S-----SSR-----                              |
| aAtIAA3_SHY2_At1g04240             | -----IE---S-----SSR-----                              |
| A_lyrata_XP_002864971              | -----                                                 |
| O_sativa_Os090527700_NP_001063732  | -----                                                 |
| A_lyrata_XP_002868277              | -----KQGPVDLN-----VNGAPKEK-----                       |
| aAtIAA14_SLR_At4g14550             | -----KQGHVDLN-----TNGAPKEK-----                       |
| A_lyrata_XP_002883395              | -----KEGSVDLNN-----VAAAPKEK-----                      |
| aAtIAA7_AXR2_At3g23050             | -----KEGSVDLKN-----VSAVPKEK-----                      |
| P_trichocarpa_XP_002311658         | -----KEGVMDLNE-----NIKNITSKDKNH-----L-----            |
| A_lyrata_XP_002889499              | -----KEGSTTHD-----VVTFDSKEK-----                      |
| aAtIAA17_AXR3_At1g04250            | -----KEGSTTHD-----VVTFDSKEK-----                      |
| A_lyrata_XP_002884465              | -----TAMDSVSKV-----DLEN---MKEK-----                   |
| aAtIAA16_At3g04730                 | -----TAMDSVSKV-----DLEN---MKEK-----                   |
| P_trichocarpa_XP_002302075         | -----KESGADPNH-----EKTSSLQREKN-----                   |
| P_trichocarpa_XP_002328494         | -----KETGKDGSD-----QEKV-VMKEKT-----                   |
| P_trichocarpa_XP_002319075         | -----KESGK-GGD-----EEK---VMKEKT-----                  |
| P_trichocarpa_XP_002306817         | -----KEGGIDPNH-----EKT---QREKN-----                   |
| O_sativa_Os03g0633500_NP_001050713 | -----EQAQEDKE-----DADAAAAAADEKMSMKRSAS-----           |
| O_sativa_Os12g0601300_NP_001067209 | -----EAAAADDREKKVDIVGADNDDASPPAAAAAGGMKRSAS-----      |
| O_sativa_Os03g0742900_NP_001051230 | -----MEEAAAG-----KAEAPAEKA---KR-----                  |
| O_sativa_Os01g0675700_NP_001043847 | -----GSVAAAACQDK-----                                 |
| O_sativa_Os05g0559400_NP_001056300 | -----GRRAAATAGDDERG-----VREEEEEKGLG-----              |
| O_sativa_Os01g0231000_NP_001042495 | -----GKGKAAREGEVVG-----AEEEDK-----                    |
| O_sativa_Os06g0335500_NP_001057554 | -----GPAGQRREAAGGKAA-----AAAAEAEIEEEK-----            |
| P_trichocarpa_XP_002298231         | -----GPAKKD-VAQSPKP-----VQEKNSQVAAN-----              |

|                            |                                          |
|----------------------------|------------------------------------------|
| P_trichocarpa_XP_002303297 | -GPAKKDDVAQSPKP-----VQEKISQVAAAN-----    |
| P_trichocarpa_XP_002331172 | -ANSKGEFPHSSKPV-----VQENKSQVDGAN-----    |
| A_lyrata_XP_002867425      | -GSGPGSSVVKDGKS-----TTFPKPAVPVKE-----    |
| aAtIAA27_PAP2_At4g29080    | -GSGPRTSVVKDGKS-----TTFTKPAVPVKE-----    |
| aAtIAA8_At2g22670          | ---PKVKDVSKS-----IQEERSHAKGG-----        |
| aAtIAA9_At5g65670          | -EAAATQSVTKKD-----VPQNIKPGQSST-----      |
| A_lyrata_XP_002864969      | -EAAATQSVTKKD-----VPQNIKPGQSST-----      |
| A_lyrata_XP_002878628      | ---PKVKDVLK-----DERSHAKGG-----           |
| A_lyrata_XP_002862301      | -EAAATQSVTKKD-----VPQNIKPGQSST-----      |
| P_trichocarpa_XP_002302351 | -QQAKVKEIVAPK-----AGQERPHAANETRPLRN----- |

421

|                                    |                                                            |
|------------------------------------|------------------------------------------------------------|
| [                                  |                                                            |
| 480]                               |                                                            |
| aAtIAA29_At4g32280                 | -----SIVYDD---EE-----ENS---                                |
| P_trichocarpa_XP_002308067         | -----FSSNKS---DG-----ESD---                                |
| P_trichocarpa_XP_002324639         | -----CASNKS---DG-----ESD---                                |
| P_trichocarpa_XP_002309635         | -----RSINKD---DE-----EEN---                                |
| P_trichocarpa_XP_002300855         | -----SD-----MTAS---                                        |
| P_trichocarpa_XP_002307573         | -----SD-----MTAS---                                        |
| O_sativa_Os02g0141100_NP_001045857 | -----QEISTSMVSQSFQSD-----MAFNSID                           |
| O_sativa_Os02g0805100_NP_001048437 | -----TSDDDC---RR-----RKK---                                |
| O_sativa_Os06g0166500_NP_001056915 | -----DSDGEM---GN-----KRR---                                |
| A_lyrata_XP_002864517              | -----FGLNVE---DD-----LVS---                                |
| P_trichocarpa_XP_002324470         | -----F---ED---DD-----VVS---                                |
| O_sativa_Os04g0653300_NP_001054106 | -----LSVQQG---DD-----VTA---                                |
| A_lyrata_XP_002878437              | -----SG-QYY---NG-----GEN---                                |
| aAtIAA33_At5g57420                 | -----FGLNVE---DD-----LVS---                                |
| aAtIAA30_At3g62100                 | -----SG-QYY---NG-----GDN---                                |
| A_lyrata_XP_002880275              | -----SGTQYF---NG-----G---                                  |
| aAtIAA20_At2g46990                 | -----SGTQYF---NG-----G---                                  |
| P_trichocarpa_XP_002302809         | -----RQDNPS---TP-----SEQ---                                |
| P_trichocarpa_XP_002320253         | -----QQENPS---TP-----SDQ---                                |
| O_sativa_Os01g0286900_NP_001042778 | -----R-----R---                                            |
| O_sativa_Os02g0723400_NP_001047972 | -----VHIDGN---NP-----S---                                  |
| A_lyrata_XP_002885218              | -----S---PQ---RE-----AR---                                 |
| aAtIAA31_At3g17600                 | -----S---PQ---RE-----AR---                                 |
| O_sativa_Os1g0221300_NP_001067526  | -----MK-----MK---                                          |
| A_lyrata_XP_002875064              | -----QPSYRS---IT-----QLK---                                |
| aAtIAA32_MEE10_At2g01200           | -----PSYNS---IT-----QLK---                                 |
| aAtIAA34_At1g15050                 | -----                                                      |
| A_lyrata_XP_002892847              | -----                                                      |
| P_trichocarpa_XP_002314837         | -----                                                      |
| A_lyrata_XP_002869489              | -----KRTADS---MA-----ATSG---                               |
| aAtIAA11_At4g28640                 | -----KRTADS---MA-----ATSG---                               |
| P_trichocarpa_XP_002303110         | -----KRAADS---VS-----ASNG---                               |
| O_sativa_Os02g0817600_NP_001048522 | -----KRAEGP---TA-----TTSPGT                                |
| A_lyrata_XP_002889491              | -----YAAAS---NA-----TRQ---                                 |
| aAtIAA10_At1g04100                 | -----PAAAS---NA-----TRQ---                                 |
| A_lyrata_XP_002881274              | -----SHAGAS---PP-----RSSS---                               |
| aAtIAA13_At2g33310                 | -----SHAGSS---PP-----RSSS---                               |
| A_lyrata_XP_002889513              | -----SHQGAS---PP-----RSS---                                |
| aAtIAA12_BDL_At1g04550             | -----SHQGAS---PP-----RSS---                                |
| P_trichocarpa_XP_002311698         | -----SHEGGS---PT-----AGS---                                |
| P_trichocarpa_XP_002314509         | -----SHEGGS---PT-----AGS---                                |
| A_lyrata_XP_002885143              | -----NKTTY---VP-----HISHK---                               |
| aAtIAA26_At3g16500                 | -----NKTTT---VP-----HISQK---                               |
| A_lyrata_XP_002891672              | -----STKT-----TSHK---                                      |
| aAtIAA18_At1g51950                 | -----STKT-----TSHK---                                      |
| O_sativa_Os02g0228900_NP_001046357 | -----NNALAS---NN-N-----GCFQT---                            |
| P_trichocarpa_XP_002309532         | -----                                                      |
| P_trichocarpa_XP_002324753         | -----TDEKQY---KN-----                                      |
| P_trichocarpa_XP_002303315         | QSLPVMDEKESQPCCTKVVVELPQCAEKKAF---STPAP-----ANTAVPNSSQK--- |
| O_sativa_Os01g0741900_NP_001044208 | EMIAAVS-----ERKKGC---CPPPPPHGAPATPARNRPOTQG---             |
| O_sativa_Os05g0523300_NP_001056086 | DENMAG-----ERKKGC---CPSP-----PCSAAAHSSNPQG---              |
| O_sativa_Os01g0190300_NP_001042263 | -----PSG---                                                |
| A_lyrata_XP_002872184              | -----                                                      |
| aAtIAA28_At5g25890                 | -----                                                      |
| O_sativa_Os08g0109400_NP_001060811 | -----NRAASS-----                                           |
| P_patens_IAA1A_BAB71765            | -----DCANRKGWVAVSPVQPP-----PAQ---                          |
| P_patens_IAA1B_BAB71766            | -----DCANRKGWVAVSPVQPP-----PAQ---                          |
| P_patens_XP_001765051              | -----DVINRNKAIAPASNEQP-----LAQ---                          |
| A_lyrata_XP_002882951              | -----GDVEKVNDSV-----AAK---                                 |
| aAtIAA19_MSG2_At3g15540            | -----GDAEKVNDSV-----AAK---                                 |

|                                    |                                       |
|------------------------------------|---------------------------------------|
| A_lyrata_XP_002894404              | -----ED-ES--LP-----VVK---             |
| aAtIAA6_SHY1_At1g52830             | -----ED-ES--LP-----VVK---             |
| P_trichocarpa_XP_002299626         | -----TDGRK--T-----QTT---              |
| P_trichocarpa_XP_002304179         | -----TDDRK--V-----QTK---              |
| A_lyrata_XP_002892874              | -----E--P-----ATK---                  |
| aAtIAA5_At1g15580                  | -----E--P-----AKK---                  |
| A_lyrata_XP_002887832              | -----NTAK--PP-----AAK---              |
| aAtIAA15_At1g80390                 | -----PP-----APK---                    |
| P_trichocarpa_XP_002299625         | -----PP-----SPK---                    |
| O_sativa_Os01g0178500_NP_001042192 | -----PP-----SPK---                    |
| O_sativa_Os05g0178600_NP_001054800 | -----HDAVEA--APP-----VAK---           |
| O_sativa_Os06g0597000_NP_001057986 | -----AKIKPA--A-----AAK---             |
| O_sativa_Os03g0633800_NP_001050714 | -----EDGASP--A-----SK---              |
| O_sativa_Os12g0601400_NP_001067210 | -----HDDDTA--AP-----AK---             |
| O_sativa_Os03g0797800_NP_001051565 | -----NSEGDD--AP-----PAK---            |
| O_sativa_Os07g0182400_NP_001059051 | -----NGERDS--AP-----PAK---            |
| P_trichocarpa_XP_002300804         | -----SHDQET--AP-----PIK---            |
| P_trichocarpa_XP_002307625         | -----SHEQET--AP-----PTK---            |
| P_trichocarpa_XP_002319642         | -----DQETAS--APNTYSFDM-----HATCR---   |
| P_trichocarpa_XP_002328339         | -----DQETAP--AP-----K---              |
| P_trichocarpa_XP_002312567         | -----EESA--LP-----PAK---              |
| P_trichocarpa_XP_002314656         | -----EESA--PP-----PAK---              |
| A_lyrata_XP_002870306              | -----EES--TP-----PTK---               |
| aAtIAA1_AXR5_At4g14560             | -----EES--TP-----PTK---               |
| A_lyrata_XP_002885542              | -----EES--TP-----PTK---               |
| aAtIAA2_At3g23030                  | -----KNET--AS-----PPK---              |
| A_lyrata_XP_002865407              | -----KTET--AS-----PPK---              |
| aAtIAA4_At5g43700                  | -----KTET--SP-----PRK---              |
| A_lyrata_XP_002892202              | -----KTET--SP-----PRK---              |
| aAtIAA3_SHY2_At1g04240             | -----KTEASCCSVLMVSFLD---SG-----IFR--- |
| A_lyrata_XP_002864971              | -----TFL--KDPSK--PP-----A-K---        |
| O_sativa_Os090527700_NP_001063732  | -----TFL--KDPSK--PP-----A-K---        |
| A_lyrata_XP_002868277              | -----TTL--KDPSK--PP-----T-K---        |
| aAtIAA14_SLR_At4g14550             | -----TTL--KDPSK--PP-----A-K---        |
| A_lyrata_XP_002883395              | -----TTL--KDPSK--PP-----A-K---        |
| aAtIAA7_AXR2_At3g23050             | -----PAVTI--KDDPAK--PP-----A-K---     |
| P_trichocarpa_XP_002311658         | -----SSCP--KDDPAK--PP-----S-K---      |
| A_lyrata_XP_002889499              | -----SACP--KDDPAK--PP-----A-K---      |
| aAtIAA17_AXR3_At1g04250            | -----VVK--PP-----A-K---               |
| A_lyrata_XP_002884465              | -----VVK--PP-----A-K---               |
| aAtIAA16_At3g04730                 | -----LLA--TDDPAK--PP-----A-K---       |
| P_trichocarpa_XP_002302075         | -----VAP-RPNDPAK--PP-----S-K---       |
| P_trichocarpa_XP_002328494         | -----VAPPASTDDPAK--PP-----A-K---      |
| P_trichocarpa_XP_002319075         | -----LLA--TDDPAK--PP-----A-K---       |
| P_trichocarpa_XP_002306817         | -----QSSVVTAEPDPAK--PR-----APK---     |
| O_sativa_Os03g0633500_NP_001050713 | -----QSSVVTAADPEK--PR-----APK---      |
| O_sativa_Os12g0601300_NP_001067209 | -----PAEAAAADAEEK--PP-----APK---      |
| O_sativa_Os03g0742900_NP_001051230 | -----AAPAAA--PP-----AAK---            |
| O_sativa_Os01g0675700_NP_001043847 | -----EAAAGA--PR-----AAK---            |
| O_sativa_Os05g0559400_NP_001056300 | -----KVAAPP--QP-----AAK---            |
| O_sativa_Os01g0231000_NP_001042495 | -----KK--AQ--AP-----AAK---            |
| O_sativa_Os06g0335500_NP_001057554 | -----EN--SS--AP-----AAK---            |
| P_trichocarpa_XP_002298231         | -----EN--SS--AP-----AAK---            |
| P_trichocarpa_XP_002303297         | -----TNGHGA--AP-----ASK---            |
| P_trichocarpa_XP_002331172         | -----KKSSAT--AP-----ASK---            |
| A_lyrata_XP_002867425              | -----KKSSAT--AP-----ASK---            |
| aAtIAA27_PAP2_At4g29080            | -----LNN--AP-----AAK---               |
| aAtIAA8_At2g22670                  | -----TNNSSS--PP-----AAK---            |
| aAtIAA9_At5g65670                  | -----TNNSSS--PP-----AAK---            |
| A_lyrata_XP_002864969              | -----LNN--AP-----AAK---               |
| A_lyrata_XP_002878628              | -----LNN--AP-----AAK---               |
| A_lyrata_XP_002862301              | -----TNNSSS--PP-----AAK---            |
| P_trichocarpa_XP_002302351         | -----SSANNSS--AP-----APK---           |

[ 540 ]

|                                    |                                                           |
|------------------------------------|-----------------------------------------------------------|
| aAtIAA29_At4g32280                 | -----EVVGWPPP-VKTCMIKYGSYHHRHIRNHHHCOPYHHRGRITAMNNNISNP-- |
| P_trichocarpa_XP_002308067         | -----GIVGWPP I-K-FKRRK-----LSRQNSRVLEVN-----              |
| P_trichocarpa_XP_002324639         | -----WIVGWPP I-K-FKRRK-----LSRQSSRALEIN-----              |
| P_trichocarpa_XP_002309635         | -----QVVGWPP I-KSWRKKV-----LHHQHQAQGHVVNS-----            |
| P_trichocarpa_XP_002308855         | -----SCVDESGFLQ--SSENVQVNPNS-----                         |
| P_trichocarpa_XP_002307573         | -----SCVDESGFLQ--SSENVQVNPNS-----                         |
| O_sativa_Os02g0141100_NP_001045857 | SAINDGAFLNKNSWP-----AAPLLQR-----                          |

|                                    |                                                            |
|------------------------------------|------------------------------------------------------------|
| O_sativa_Os02g0805100_NP_001048437 | -----TVVGWPPV-SS--ARR-----                                 |
| O_sativa_Os06g0166500_NP_001056915 | -----KLVGWPPV-KCLHRRR-----                                 |
| A_lyrata_XP_002864517              | -----SVV--PPV-T-----                                       |
| P_trichocarpa_XP_002324470         | -----TMI--PPV-T-----                                       |
| O_sativa_Os04g0653300_NP_001054106 | -----GVV--PPV-T-----                                       |
| A_lyrata_XP_002878437              | -----HEYDGV-GAAEE---M-----MIMEEEDQ-----                    |
| aAtIAA33_At5g57420                 | -----SVV--PPV-T-----                                       |
| aAtIAA30_At3g62100                 | -----HEYDGV-GAAEE---M-----MIMEEEEEQ-----                   |
| A_lyrata_XP_002880275              | -----YGYSVA-APAAE-----EEEE-----                            |
| aAtIAA20_At2g46990                 | -----YGYSVA-APAVEDAEYV-----AAVEEEEE-----                   |
| P_trichocarpa_XP_002302809         | -----LLDWPPV-KPSPG-----KAVTSEE-----                        |
| P_trichocarpa_XP_002320253         | -----QLSDWPPV-KPFLR-----KALASEE-----                       |
| O_sativa_Os01g0286900_NP_001042778 | -----RPPS-----                                             |
| O_sativa_Os02g0723400_NP_001047972 | -----TPRSSL-TTATV-----TADRGGGG-----                        |
| A_lyrata_XP_002885218              | -----QDWPPV-KSRLR-----DTLKGRRL-----                        |
| aAtIAA31_At3g17600                 | -----QDWPPV-KSRLR-----DTLKGRRL-----                        |
| O_sativa_Os11g0221300_NP_001067526 | -----DRNASAEVVKPGLSPS-----                                 |
| A_lyrata_XP_002875064              | -----SEDTGHKRLAHGYNNEEE-----                               |
| aAtIAA32_MEE10_At2g01200           | -----SEDTGHQRLAQGYNNEGE-----                               |
| aAtIAA34_At1g15050                 | -----SG-QR---YCSNEG-----                                   |
| A_lyrata_XP_002892847              | -----SG-QK---YCSNEG-----                                   |
| P_trichocarpa_XP_002314837         | -----SG-HR---MPLAEGVQ-----                                 |
| A_lyrata_XP_002869489              | -----QVVGWPPV-RTYRMNSMVN-----QAKASATEDPN-----              |
| aAtIAA11_At4g28640                 | -----QVVGWPPV-RTYRMNSMVN-----QAKASATEDPN-----              |
| P_trichocarpa_XP_002303110         | -----AASSQVVGWPPV-RSHRMHIMVN-----QAKSQATEEFNSMNR-----      |
| O_sativa_Os02g0817600_NP_001048522 | VASGHPHSFGVVGWPPV-RQFRMNSLFN-----QAKENTSETDTKK-----        |
| A_lyrata_XP_002889491              | -----VAVGWPPV-RTYRINSLVN-----QAKSLATEGGLS-----             |
| aAtIAA10_At1g04100                 | -----VAVGWPPV-RTYRINSLVN-----QAKSLATEGGLS-----             |
| A_lyrata_XP_002881274              | -----QVVGWPPV-GSHRMNSLVNN-----QATKSAREEEEEAG-----          |
| aAtIAA13_At2g33310                 | -----QVVGWPPV-GSHRMNSLVNN-----QATKSAREEEEEAG-----          |
| A_lyrata_XP_002889513              | -----QVVGWPPV-GSHRMNSLVNN-----QAMKAARAEEDGEGE-----         |
| aAtIAA12_BDL_At1g04550             | -----QVVGWPPV-GLHRMNSLVNN-----QAMKAARAEEDGEGE-----         |
| P_trichocarpa_XP_002311698         | -----QVVGWPPV-RAYRMNSLVN-----QAKAARAEEDKGIGE-----          |
| P_trichocarpa_XP_002314509         | -----QVVGWPPV-RAYRMNSLVS-----QAKAARAEEDKGIGE-----          |
| A_lyrata_XP_002885143              | -----RTAPGPVVGWPPV-RSFRKNLASTS-----SSKLGNESSLHGG-----      |
| aAtIAA26_At3g16500                 | -----RTAPGPVVGWPPV-RSFRKNLASTS-----SSKLGNESS-HGG-----      |
| A_lyrata_XP_002891672              | -----RTAPGPVVGWPPV-RSFRKNLANGS-----SSKLGNDSTTSNGVVF-----   |
| aAtIAA18_At1g51950                 | -----RTAPGPVVGWPPV-RSFRKNLANGS-----SSKLGNDSTTSNGVVF-----   |
| O_sativa_Os02g0228900_NP_001046357 | -----RSPSTPVVGWPPV-RTFRRNLATSS-----KASL-----               |
| P_trichocarpa_XP_002309532         | -----ATVVGWPPV-RSFRKNIASSS-----TSKMVSELP-----              |
| P_trichocarpa_XP_002324753         | -----RAALAPVVGWPPV-RSFRKNLAGSS-----TPKLVSESR-----          |
| P_trichocarpa_XP_002303315         | -----RIAPGPVVGWPPV-RSFRKNLATS-----SGSN-----                |
| O_sativa_Os01g0741900_NP_001044208 | -----RGAAAPVVGWPPV-RSFRRNLAASSS-----SSK--HSP-----          |
| O_sativa_Os05g0523300_NP_001056086 | -----RGAIPVVGWPPV-RSFRRNLTNGS-----SFK--QSP-----            |
| O_sativa_Os01g0190300_NP_001042263 | -----AAAAAPVVGWPPV-RSFRRNLAASSS-----SSSKQAPPPSS-----       |
| A_lyrata_XP_002872184              | -----KVEVAPVVGWPPV-RSSRRNLTAQ-----                         |
| aAtIAA28_At5g25890                 | -----RVEVAPVVGWPPV-RSSRRNLTAQ-----                         |
| O_sativa_Os08g0109400_NP_001060811 | -----AQLVGWPPV-RAFRRKNSLTPKPADADLMN-----KVKLCSDEGHGSR----- |
| P_patens_IAA1A_BAB71765            | -----NQTVGWPPV-KNFNMNTTAP-----PASTPARACPSV-----            |
| P_patens_IAA1B_BAB71766            | -----NQTVGWPPV-KNFNMNTTAP-----PASTPARACPSV-----            |
| P_patens_XP_001765051              | -----NQTVGWPPV-KNFNMNTTAP-----PPSAPATACRSVP-----M          |
| A_lyrata_XP_002882951              | -----SQVVGWPPV-CSYRKNNSCKE-----AA---T-----                 |
| aAtIAA19_MSG2_At3g15540            | -----SQVVGWPPV-CSYRKNNSCKE-----AS---T-----                 |
| A_lyrata_XP_002894404              | -----SQAVGWPPV-CSYRRQKNNEE-----AS---K-----                 |
| aAtIAA6_SHY1_At1g52830             | -----SQAVGWPPV-CSYRRKKNNEE-----AS---K-----                 |
| P_trichocarpa_XP_002299626         | -----SQVVGWPPV-CSYRKNNSFNE-----KD---S-----                 |
| P_trichocarpa_XP_002304179         | -----SQVVGWPPV-CSYRKNISFNE-----RDR---H-----                |
| A_lyrata_XP_002892874              | -----SQVVGWPPV-CSYRRKNSLEQ-----TK-----                     |
| aAtIAA5_At1g15580                  | -----SQVVGWPPV-CSYRRKNSLER-----TK-----                     |
| A_lyrata_XP_002887832              | -----DQLVGWPPV-TTARKTVRR-----                              |
| aAtIAA15_At1g80390                 | -----DQLVGWPPV-ATARKTVRR-----                              |
| P_trichocarpa_XP_002299625         | -----AQVVGWPPV-RAYRKNAMKS-----                             |
| O_sativa_Os01g0178500_NP_001042192 | -----ARVVGWPPV-RSFRKNALA-----                              |
| O_sativa_Os05g0178600_NP_001054800 | -----ARVVGWPPV-RAFRRKNALAL-----AA---A-----                 |
| O_sativa_Os06g0597000_NP_001057986 | -----ARAVGWPPV-RAYRRNALRE-----                             |
| O_sativa_Os03g0633800_NP_001050714 | -----AQVVGWPPV-RSYRKSCFQQ-----SA---AAS-----                |
| O_sativa_Os12g0601400_NP_001067210 | -----AQVVGWPPV-RSYRKSCLOP-----TT---TTT-----                |
| O_sativa_Os03g0797800_NP_001051565 | -----QVVGWPPV-GSYRRSTFQSS-----SS---STA-----                |
| O_sativa_Os07g0182400_NP_001059051 | -----AQVVGWPPV-RAYRRNTFHQA-----AA---AAA-----               |
| P_trichocarpa_XP_002300804         | -----AQVVGWPPV-RSYRKNCLQPK-----KN---DR-----                |
| P_trichocarpa_XP_002307625         | -----AQVVGWPPV-RSYRKNCLQPK-----KN---DQ-----                |
| P_trichocarpa_XP_002319642         | -----AQVVGWPPV-RSYRKNCLQAK-----KL---EA-----                |
| P_trichocarpa_XP_002328339         | -----TQVVGWPPV-RSYRKNCLQAR-----KL---EA-----                |

|                                    |                                 |          |     |
|------------------------------------|---------------------------------|----------|-----|
| P_trichocarpa_XP_002312567         | -----VQIVGWPPV-RSYRKNLQPK-----  | KA       | ED  |
| P_trichocarpa_XP_002314656         | -----AQIVGWPPV-RSYRKNLQPK-----  | KA       | EA  |
| A_lyrata_XP_002870306              | -----TQIVGWPPV-RSNRKN--NNN----- | KN       | VS  |
| aAtIAA1_AXR5_At4g14560             | -----TQIVGWPPV-RSNRKN--NNN----- | KN       | VS  |
| A_lyrata_XP_002885542              | -----TQIVGWPPV-RSSRKN--NNS----- |          | VS  |
| aAtIAA2_At3g23030                  | -----TQIVGWPPV-RSSRKN--NNS----- |          | VS  |
| A_lyrata_XP_002865407              | -----AQIVGWPPV-RSYRKNNIQTK----- | KN       | ES  |
| aAtIAA4_At5g43700                  | -----AQIVGWPPV-RSYRKNNVQTK----- | KS       | ES  |
| A_lyrata_XP_002892202              | -----AQIVGWPPV-RSYRKNNIQTK----- | KN       | ESE |
| aAtIAA3_SHY2_At1g04240             | -----AQIVGWPPV-RSYRKNNIQSK----- | KN       | ESE |
| A_lyrata_XP_002864971              | -----AQIVGWPPV-RSYRKNLQPK-----  | CK       | N   |
| O_sativa_Os090527700_NP_001063732  | -----GHPVP-SSSMIQAAV-----       |          |     |
| A_lyrata_XP_002868277              | -----AQVVGWPPV-RNYRKNVMAVQ----- | KS       | G-E |
| aAtIAA14_SLR_At4g14550             | -----AQVVGWPPV-RNYRKNVMAVQ----- | KS       | G-E |
| A_lyrata_XP_002883395              | -----AQVVGWPPV-RNYRKNMMTQQ----- | KT       | S-G |
| aAtIAA7_AXR2_At3g23050             | -----AQVVGWPPV-RNYRKNMMTQQ----- | KT       | SSG |
| P_trichocarpa_XP_002311658         | -----AQVVGWPPV-RSYRKNVMAQK----- | NA       | SEE |
| A_lyrata_XP_002889499              | -----AQVVGWPPV-RSYRKNVMVSC----- | QK       | S   |
| aAtIAA17_AXR3_At1g04250            | -----AQVVGWPPV-RSYRKNVMVSC----- | QK       | S   |
| A_lyrata_XP_002884465              | -----AQVVGWPPV-RSFRKNVMSGQ----- | KP       | T   |
| aAtIAA16_At3g04730                 | -----AQVVGWPPV-RSFRKNVMSGQ----- | KP       | T   |
| P_trichocarpa_XP_002302075         | -----AQVVGWPPV-RSFRKNMLAVQ----- | KS       | S   |
| P_trichocarpa_XP_002328494         | -----AQVVGWPPV-RSFRKNMLAVQ----- | KN       | S   |
| P_trichocarpa_XP_002319075         | -----AQVVGWPPV-RSFRKNMLAVQ----- | KN       | S   |
| P_trichocarpa_XP_002306817         | -----AQVVGWPPV-RSFRKNMLAVQ----- | KS       | S   |
| O_sativa_Os03g0633500_NP_001050713 | -----AQVVGWPPV-RSFRKNVLAEK----- | CK       |     |
| O_sativa_Os12g0601300_NP_001067209 | -----AQVVGWPPV-RSYRKNILAVQ----- | AD       | KGK |
| O_sativa_Os03g0742900_NP_001051230 | -----AQVVGWPPV-RSFRKNIMTVQ----- | SV       | KSK |
| O_sativa_Os01g0675700_NP_001043847 | -----AQVVGWPPV-RNYRKNLTAAS----- | ASK      | GKG |
| O_sativa_Os05g0559400_NP_001056300 | -----AQVVGWPPV-RSYRKNLTAAS----- | ATK      | TKG |
| O_sativa_Os01g0231000_NP_001042495 | -----AQVVGWPPV-RSYRKNLTAAS----- | QIK      | SNK |
| O_sativa_Os06g0335500_NP_001057554 | -----AQVVGWPPV-RSYRKNLTAAS----- | QPALKGKD |     |
| P_trichocarpa_XP_002298231         | -----TQVVGWPPV-RSFRKNLTAAS----- | LAK      | NN  |
| P_trichocarpa_XP_002303297         | -----AQVVGWPPV-RSFRKNLTAAS----- | LAK      | NN  |
| P_trichocarpa_XP_002331172         | -----AQVVGWPPV-RSFRKNLTAAS----- | LAK      | NN  |
| A_lyrata_XP_002867425              | -----AQVVGWPPV-RSFRKNLTAAS----- | LSK      | ND  |
| aAtIAA27_PAP2_At4g29080            | -----AQVVGWPPV-RSFRKNLTAAS----- | LSK      | ND  |
| aAtIAA8_At2g22670                  | -----AQVVGWPPV-RSFRKNLTAAS----- | LSK      | ND  |
| aAtIAA9_At5g65670                  | -----AQVVGWPPV-RSFRKNLTAAS----- | LSK      | ND  |
| A_lyrata_XP_002864969              | -----AQVVGWPPV-RSFRKNLTAAS----- | LSK      | ND  |
| A_lyrata_XP_002878628              | -----AQVVGWPPV-RSFRKNLTAAS----- | LSK      | ND  |
| A_lyrata_XP_002862301              | -----AQVVGWPPV-RSFRKNLTAAS----- | LSK      | ND  |
| P_trichocarpa_XP_002302351         | -----AQVVGWPPV-RSFRKNLTAAS----- | LSK      | ND  |

[ 600 ]

aAtIAA29\_At4g32280  
P\_trichocarpa\_XP\_002308067  
P\_trichocarpa\_XP\_002324639  
P\_trichocarpa\_XP\_002309635  
P\_trichocarpa\_XP\_002300855  
P\_trichocarpa\_XP\_002307573  
O\_sativa\_Os02g0141100\_NP\_001045857  
O\_sativa\_Os02g0805100\_NP\_001048437  
O\_sativa\_Os06g0166500\_NP\_001056915  
A\_lyrata\_XP\_002864517  
P\_trichocarpa\_XP\_002324470  
O\_sativa\_Os04g0653300\_NP\_001054106  
A\_lyrata\_XP\_002878437  
aAtIAA33\_At5g57420  
aAtIAA30\_At3g62100  
A\_lyrata\_XP\_002880275  
aAtIAA20\_At2g46990  
P\_trichocarpa\_XP\_002302809  
P\_trichocarpa\_XP\_002320253  
O\_sativa\_Os01g0286900\_NP\_001042778  
O\_sativa\_Os02g0723400\_NP\_001047972  
A\_lyrata\_XP\_002885218  
aAtIAA31\_At3g17600  
O\_sativa\_Os11g0221300\_NP\_001067526  
A\_lyrata\_XP\_002875064  
aAtIAA32\_MEE10\_At2g01200  
aAtIAA34\_At1g15050

|                        |       |
|------------------------|-------|
| TTATVGSSSSSSISSRS----- | SMYV  |
| -RAVDNGCEDCQARSSN----- | SMYI  |
| -RAVDNGYEDCQARTSK----- | YMYI  |
| TRMATAGNYEYGTG-SN----- | SKYV  |
| -----                  | TRTFV |
| -----                  | TRTFV |
| -----                  | MRTFT |
| -----                  | YV    |
| -----ACGGAN-----       | YV    |
| -----DGGCGGG-----      | YV    |
| -----                  |       |
| -----                  |       |
| -----NECNSVG-----      | SFYV  |
| -----                  |       |
| -----NECNSVG-----      | SFYV  |
| -----NECHSVG-----      | SFYV  |
| -----NECNSVG-----      | SFYV  |
| -----NECCSS-----       | TLFV  |
| -----NECSSA-----       | TLFV  |
| -----GGARRRR-----      | TLFV  |
| -----GGHRRRR-----      | SLFV  |
| -----LRRGDDT-----      | SLFV  |
| -----LRRGDDT-----      | SLFV  |
| -----                  | RFV   |
| -----SRGK-----         | YAYV  |
| -----SRGK-----         | YAYV  |
| -----YRRK-----         | WGYV  |

|                                    |                                               |                              |
|------------------------------------|-----------------------------------------------|------------------------------|
| A_lyrata_XP_002892847              | -----YRRN-----                                | WGYV                         |
| P_trichocarpa_XP_002314837         | -----SKDR-----                                | WAYV                         |
| A_lyrata_XP_002869489              | -----LEIRQEV-NKNR-----                        | TDATKMRN-----SMFV            |
| aAtIAA11_At4g28640                 | -----LEISQAV-NKNR-----                        | SDSTKMRN-----SMFV            |
| P_trichocarpa_XP_002303110         | -----KNAVEEKVGNKNIN-----                      | IGNTKTRT-----SLFV            |
| O_sativa_Os02g0817600_NP_001048522 | -----TATNESDVQKDKE-----                       | EGEKKGR-----VAGWV            |
| A_lyrata_XP_002889491              | -----SDIQKDTVKNSVVAAK-----                    | NDDVCFIKSTR-----TSMLV        |
| aAtIAA10_At1g04100                 | -----SGIQKETTKSVVVAAK-----                    | NDDACFIKSSR-----TSMLV        |
| A_lyrata_XP_002881274              | -----KKIVKDDEPKDVT-----                       | KKVNGKVP-----VGFI            |
| aAtIAA13_At2g33310                 | -----KKVKDDEPKDVT-----                        | KKVNGKVQ-----VGFI            |
| A_lyrata_XP_002889513              | -----KKVAKNDELKDVS-----                       | MKVNGKVQG-----LGFV           |
| aAtIAA12_BDL_At1g04550             | -----KKVKNDELKDVS-----                        | MKVNPKVQG-----LGFV           |
| P_trichocarpa_XP_002311698         | -----KDISKDNLKKKICNG-----                     | NKTSAPSNEKG-----HLGFV        |
| P_trichocarpa_XP_002314509         | -----KDKSKENLKKKICNG-----                     | NKTNATGNEKG-----HLGFV        |
| A_lyrata_XP_002885143              | -----QINKSDDGKQVETKKEG-----                   | MFV                          |
| aAtIAA26_At3g16500                 | -----QINKSDDGKQVETKKEG-----                   | MFV                          |
| A_lyrata_XP_002891672              | -----LKNQKDDDDVKTMEPKRQGG-----                | MFV                          |
| aAtIAA18_At1g51950                 | -----LKNQKCDAAAKTEPKRQGG-----                 | MFV                          |
| O_sativa_Os02g0228900_NP_001046357 | -----ELQNGKKAAKAEEIKRAP-----                  | FI                           |
| P_trichocarpa_XP_002309532         | -----NKTSEEGSSLKPDSEFRND-----                 | LFV                          |
| P_trichocarpa_XP_002324753         | -----NKPPKEGSSLKPDSEFRND-----                 | LFV                          |
| P_trichocarpa_XP_002303315         | -----SKPTFESQNKPAETCKKG-----                  | LFV                          |
| O_sativa_Os01g0741900_NP_001044208 | -----EPQNDNANAKVTLTCKKN-----                  | PLV                          |
| O_sativa_Os05g0523300_NP_001056086 | -----ERQNDDEADDKAKPICCKR-----                 | PLV                          |
| O_sativa_Os01g0190300_NP_001042263 | -----SPQNGDKASKDGGAEKG-----                   | MFV                          |
| A_lyrata_XP_002872184              | -----LKEEMKKRESDEEKE-----                     | LYV                          |
| aAtIAA28_At5g25890                 | -----LKEEMKKRESDEEKE-----                     | LYV                          |
| O_sativa_Os08g0109400_NP_001060811 | -----CAAQERRSSS-----                          | TMFV                         |
| P_patens_IAA1A_BAB71765            | -----QRKGAS-----                              | TSSSG-----NLV                |
| P_patens_IAA1B_BAB71766            | -----QRKGAS-----                              | TSSSG-----NLV                |
| P_patens_XP_001765051              | -----PRRGAS-----                              | SSSSG-----NLV                |
| A_lyrata_XP_002882951              | -----TKV-----                                 | GLG-----YV                   |
| aAtIAA19_MSG2_At3g15540            | -----TKV-----                                 | GLG-----YV                   |
| A_lyrata_XP_002894404              | -----HET-----                                 | ATG-----YV                   |
| aAtIAA6_SHY1_At1g52830             | -----HET-----                                 | ATG-----YV                   |
| P_trichocarpa_XP_002299626         | -----HET-----                                 | SKI-----YV                   |
| P_trichocarpa_XP_002304179         | -----HET-----                                 | SKI-----YV                   |
| A_lyrata_XP_002892874              | -----SS-----                                  | SS-----YV                    |
| aAtIAA5_At1g15580                  | -----SS-----                                  | SS-----YV                    |
| A_lyrata_XP_002887832              | -----C-----                                   | KYV                          |
| aAtIAA15_At1g80390                 | -----C-----                                   | KYV                          |
| P_trichocarpa_XP_002299625         | -----A-----                                   | KYV                          |
| O_sativa_Os01g0178500_NP_001042192 | -----SSSKA-----                               | KFV                          |
| O_sativa_Os05g0178600_NP_001054800 | -----SSSKA-----                               | KFV                          |
| O_sativa_Os06g0597000_NP_001057986 | -----DSARA-----                               | KLV                          |
| O_sativa_Os03g0633800_NP_001050714 | -----KSKAAVSSCENNKEPITKNAAPAPAASSAAAANGG----- | SLV                          |
| O_sativa_Os12g0601400_NP_001067210 | -----KSK-----                                 | PPAAAAAETQKEDVAGAGG-----LFV  |
| O_sativa_Os03g0797800_NP_001051565 | -----AAA-----                                 | K--GKGGGETDQGRKNKGGG-----LYV |
| O_sativa_Os07g0182400_NP_001059051 | -----ATK-----                                 | K--G--GDEKQKQQQGGG-----LYV   |
| P_trichocarpa_XP_002300804         | -----VDG-----                                 | AG-----MYV                   |
| P_trichocarpa_XP_002307625         | -----VDG-----                                 | AG-----MYV                   |
| P_trichocarpa_XP_002319642         | -----EA-----                                  | AG-----LYV                   |
| P_trichocarpa_XP_002328339         | -----EA-----                                  | AG-----LYV                   |
| P_trichocarpa_XP_002312567         | -----EAA-----                                 | AG-----MYV                   |
| P_trichocarpa_XP_002314656         | -----EAA-----                                 | AG-----MYV                   |
| A_lyrata_XP_002870306              | -----EG-----                                  | QG-----NYV                   |
| aAtIAA1_AXR5_At4g14560             | -----EG-----                                  | QG-----NYV                   |
| A_lyrata_XP_002885542              | -----HEG-----                                 | QG-----IYV                   |
| aAtIAA2_At3g23030                  | -----HEG-----                                 | QG-----IYV                   |
| A_lyrata_XP_002865407              | -----SDEV-----                                | GRPGP-----GAMFV              |
| aAtIAA4_At5g43700                  | -----SDEV-----                                | GRPGP-----GAMFV              |
| A_lyrata_XP_002892202              | -----AEEAMS-----                              | SGGGTVA-----FV               |
| aAtIAA3_SHY2_At1g04240             | -----AEEAMS-----                              | SGGGTVA-----FV               |
| A_lyrata_XP_002864971              | -----VEEASSEK-----                            | AGSGGGGAAG-----AGLV          |
| O_sativa_Os090527700_NP_001063732  | -----VEEASSEK-----                            | AGNFGGGAAG-----AGLV          |
| A_lyrata_XP_002868277              | -----GKAST-----                               | GGSSAA-----FV                |
| aAtIAA14_SLR_At4g14550             | -----S-----                                   | GGPEAAA-----FV               |
| A_lyrata_XP_002883395              | -----S-----                                   | GGPEAAA-----FV               |
| aAtIAA7_AXR2_At3g23050             | -----TGATVGN-----                             | DKTSGSSGATSSASVCAAVAYV       |
| P_trichocarpa_XP_002311658         |                                               |                              |
| A_lyrata_XP_002889499              |                                               |                              |
| aAtIAA17_AXR3_At1g04250            |                                               |                              |
| A_lyrata_XP_002884465              |                                               |                              |







aAtIAA15\_At1g80390  
P\_trichocarpa\_XP\_002299625  
O\_sativa\_Os01g0178500\_NP\_001042192  
O\_sativa\_Os05g0178600\_NP\_001054800  
O\_sativa\_Os06g0597000\_NP\_001057986  
O\_sativa\_Os03g0633800\_NP\_001050714  
O\_sativa\_Os12g0601400\_NP\_001067210  
O\_sativa\_Os03g0797800\_NP\_001051565  
O\_sativa\_Os07g0182400\_NP\_001059051  
P\_trichocarpa\_XP\_002300804  
P\_trichocarpa\_XP\_002307625  
P\_trichocarpa\_XP\_002319642  
P\_trichocarpa\_XP\_002328339  
P\_trichocarpa\_XP\_002312567  
P\_trichocarpa\_XP\_002314656  
A\_lyrata\_XP\_002870306  
aAtIAA1\_AXR5\_At4g14560  
A\_lyrata\_XP\_002885542  
aAtIAA2\_At3g23030  
A\_lyrata\_XP\_002865407  
aAtIAA4\_At5g43700  
A\_lyrata\_XP\_002892202  
aAtIAA3\_SHY2\_At1g04240  
A\_lyrata\_XP\_002864971  
O\_sativa\_Os090527700\_NP\_001063732  
A\_lyrata\_XP\_002868277  
aAtIAA14\_SLR\_At4g14550  
A\_lyrata\_XP\_002883395  
aAtIAA7\_AXR2\_At3g23050  
P\_trichocarpa\_XP\_002311658  
A\_lyrata\_XP\_002889499  
aAtIAA17\_AXR3\_At1g04250  
A\_lyrata\_XP\_002884465  
aAtIAA16\_At3g04730  
P\_trichocarpa\_XP\_002302075  
P\_trichocarpa\_XP\_002328494  
P\_trichocarpa\_XP\_002319075  
P\_trichocarpa\_XP\_002306817  
O\_sativa\_Os03g0633500\_NP\_001050713  
O\_sativa\_Os12g0601300\_NP\_001067209  
O\_sativa\_Os03g0742900\_NP\_001051230  
O\_sativa\_Os01g0675700\_NP\_001043847  
O\_sativa\_Os05g0559400\_NP\_001056300  
O\_sativa\_Os01g0231000\_NP\_001042495  
O\_sativa\_Os06g0335500\_NP\_001057554  
P\_trichocarpa\_XP\_002298231  
P\_trichocarpa\_XP\_002303297  
P\_trichocarpa\_XP\_002331172  
A\_lyrata\_XP\_002867425  
aAtIAA27\_PAP2\_At4g29080  
aAtIAA8\_At2g22670  
aAtIAA9\_At5g65670  
A\_lyrata\_XP\_002864969  
A\_lyrata\_XP\_002878628  
A\_lyrata\_XP\_002862301  
P\_trichocarpa\_XP\_002302351

[  
780]

aAtIAA29\_At4g32280  
P\_trichocarpa\_XP\_002308067  
P\_trichocarpa\_XP\_002324639  
P\_trichocarpa\_XP\_002309635  
P\_trichocarpa\_XP\_002300855  
P\_trichocarpa\_XP\_002307573  
O\_sativa\_Os02g0141100\_NP\_001045857  
O\_sativa\_Os02g0805100\_NP\_001048437  
O\_sativa\_Os06g0166500\_NP\_001056915  
A\_lyrata\_XP\_002864517  
P\_trichocarpa\_XP\_002324470  
O\_sativa\_Os04g0653300\_NP\_001054106  
A\_lyrata\_XP\_002878437  
aAtIAA33\_At5g57420

--VTE----LERKG---EFVATYEDKDGDLMLVGDVPWMMFVESCRRMLMKTGDAIGL-  
RTIME----QEVNNGV---EYVPTYEDKDGDWMLVGDVPWKMVFVESCRRRLMKSSEATGFA  
RKLVD----AVNGT---EYVPTYEDKDGDWMLVGDVPWKMVFVETCQRLRLMKSSEAVNLA  
MKLVD----AVSGN---EYVPTYEDKDGDWMLVGDVPWKMVFVETCQRLRLMKSSEAVNLA  
TKLVD----LVFGA---EYVPTYEDKDGDWMLVGDVPWKMVFVESCRRRLMKSSEAVNLS  
-----ANPS---EFAITYQDKDGLMLVGDVPFDMFTSTCKKRLRIMKRSEATGLG  
-----VNPS---DFAVTYEDKDGDLMLVGDVPFEMFISTCKKRLRIMKGSEARGLG  
-----ASAA---HFAVAYEDKDGDLMLAGDVPWDMFVSSCKKRLRIMGSEAR---  
-----CSDG---QFAIAYEDKDGDLMLVGDVPWEMFVSSCKKRLRIMKGSEAR---  
-----YNGS---DFAPTYEDKDGDWMLVGDVPWDMFVSTCKKRLRIMKGSEARGLG  
-----YNGS---EFAPTYEDKDGDWMLVGDVPWDMFVSSCKKRLRIMKGSEARGLG  
-----YNGS---EHVPTYEDKDGDWMLVGDVPWDMFVNSCKKRLRIMKSEARGLG  
-----YNGS---EYVPTYEDKDGDWMLVGDVPWEMFVNSCKKRLRIMKGSEARGLG  
-----YKGS---EYAPTYEDKDGDWMLVGDVPWDMFLSSCKKRLRIMKGSEAIGLG  
-----YKGS---EYVPTYEDKDGDWMLIGDVPWDMFLIGKSEALRIIGKSEALG--  
-----YKGS---GFVPTYEDKDGDWMLVGDVPWDMFSSSQKRLRIMKGSEVP---  
-----YKGS---GFVPTYEDKDGDWMLVGDVPWDMFSSSQKRLRIMKGSEAP---  
-----YKGS---GFVPTYEDKDGDWMLVGDVPWDMFSSSQKRLRIMKGSDAPALD  
-----YKGS---GFVPTYEDKDGDWMLVGDVPWDMFSSSQKRLRIMKGSDAPALD  
-----YKGS---DFVPTYEDKDGDWMLVGDVPWEMFVSSCKKRLRIMKGSEVKGGLG  
-----YKGS---DFVPTYEDKDGDWMLVGDVPWEMFVSSCKKRLRIMKGSEVKGGLG  
-----YKGS---DFVPTYEDKDGDWMLIGDVPWEMFICTCKKRLRIMKGSEARCLLS  
-----YKGS---DFVPTYEDKDGDWMLIGDVPWEMFICTCKKRLRIMKGSEAKGLG  
TKLKD---FLNGK---DYVLTYEDKDGDWMLVGDVPWEMFIDVCKKLMKIMKGCDAIGLA  
--LMD---GYGEW---EHAVVYEDKDGDWMLVGDVPWEMFVSSCKRMRVMRACEARGLS  
SKVMD---LLNSS---EYVPSYEDKDGDWMLVGDVPWPMFVESCRRRLRIMKSEAIGLA  
SKVMD---LLNSS---EYVPSYEDKDGDWMLVGDVPWPMFVESCRRRLRIMKSEAIGLA  
SKLMN---LLNSS---EYVPSYEDKDGDWMLVGDVPWEMFVESCRRRLRIMKSEAIGLA  
SKLMN---LLNSS---EYVPSYEDKDGDWMLVGDVPWE-----  
SKLMD---LLNSS---EYVPSYEDKDGDWMLVGDVPWEMFVNSCKKRLRIMKSEAIGLA  
RKLMD---LVNSW---DYVPSYEDKDGDWMLVGDVPWPMFVDTCKKRLRIMKGSDAIGLA  
RKLMD---LVNSW---DYVPSYEDKDGDWMLVGDVPWPMFVDTCKKRLRIMKGSDAIGLA  
SILID---LLNGS---DYVPTYEDKDGDWMLVGDVPWEMFVDSCKRIRIMKSEAIGLA  
SKLID---LLNGS---DYVPTYEDKDGDWMLVGDVPWEMFVDSCKRIRIMKSEAIGLA  
SKLID---LLNGT---DYVPTYEDKDGDWMLVGDVPWDMFVESCRRRLRIMKGTEATGGLA  
SKLID---LLNSS---EYVPTYEDKDGDWMLVGDVPWGMFVDSCKKRLRIMKSEAIGLA  
SKLID---LLNGT---DYVPTYEDKDGDWMLVGDVPWEMFVDSCKKRLRIMKSEAIGLA  
SKLID---LLNGT---DYVPTYEDKDGDWMLVGDVPWDMFVESCRRRLRIMKGTEATGLG  
S--NK---LRDDL---EYVPTYEDKDGDWMLVGDVPWEMFVESCRRRLRIMKSEAIGLG  
SKIAD---LLNGS---EYVPTYEDKDGDWMLVGDVPWEMFVESCRRRLRIMKSEAIGLA  
V-----NGS---DAVPTYEDKDGDWMLVGDVPWQMFVESCRRRLRIMKSEAIGLA  
GSKAD---ALQDQ---EYVLTYEDKDADWMLVGDLPWDLFTTICRKLKIMRGSDAAGIA  
GSRAD---ALKQD---EYVLTYEDKDADWMLVGDLPWDLFTTSCRRLRIMRGSDAAGMA  
---AE---NQKDG---EYVLTYEDKDGDWMLVGDVPWEMFVDSCKRRLRIMKGSDAIGLA  
CRLMD---LLNGT---ELVPTYEDKDEDWMLVGDVPWPMFVDSCKRRLRIMKGSDAVGLA  
SCLKD---LHGS---EYVLTFEDKDGDWMLVGDVPWDMFVDSCKRRLRIMKSEAIGLA  
SRLKD---LLHGS---EYVLTYEDKDGDWMLVGDVPWDMFVNSCKRRLRIMKSEAIGLA  
SRLMD---LLHGS---EYVLTYEDKDNWMLVGDVPWKMFTDSCKRRLRIMKSEAIGLA  
SRLTD---LLRGS---EYVPTYEDKDSWMLVGDVPWEMFVDSCKKRLRIMKSEAIGLA  
SRLTD---LLRGS---EYVPTYEDKDSWMLVGDVPWEMFVDSCKKRLRIMKSEAIGLA  
IKLKD---LLHGS---EFVLTIEDKDGDWMLVGDVPWEIFETCQKLMKMGSDSIGLA  
TKLKD---LLNGK---DYVLTYEDKDGDWMLVGDVPWEMFIDVCKKLMKIMKGCDAIGLA  
TKLKD---LLNGK---DYVLTYEDKDGDWMLVGDVPWEMFIDVCKKLMKIMKGCDAIGLA  
IKLKD---LLHGS---EFVLTIEDKDGDWMLVGDVPWEIFETCQKLMKMGSDSIGLA  
-----LLR-----  
SKLKD---LLHGS---EYVLTYEDKDGDWMLVGDVPWEMFVETCKKRLRIMKSSDAIGLA

721

CLF-----  
-----  
-----  
-----  
KEGLTSAASVPSQKLSNSTSDGYMNRQEFRNSSNPDGYLNRQDFRNSSNGIASMGSIDYQ  
-----  
LDGDLGSNVLPNQACS---SSDG-VNGWRPRCDQNP-----GNPSIGPYDQF  
-----  
-----  
-----KRNE-----  
-----TGGTAV-----  
-----PQS-----  
-----  
-----KRNE-----

```

aAtIAA30_At3g62100 -----
A_lyrata_XP_002880275 -----
aAtIAA20_At2g46990 -----
P_trichocarpa_XP_002302809 -----
P_trichocarpa_XP_002320253 -----
O_sativa_Os01g0286900_NP_001042778 -----
O_sativa_Os02g0723400_NP_001047972 C-----
A_lyrata_XP_002885218 -----
aAtIAA31_At3g17600 -----
O_sativa_Os11g0221300_NP_001067526 YQEEEEEDNAAAAATADEDGDGAAADDGVAAAADDVDDVAGYTSNDDPSFD-----
A_lyrata_XP_002875064 -----
aAtIAA32_MEE10_At2g01200 -----
aAtIAA34_At1g15050 -----
A_lyrata_XP_002892847 -----
P_trichocarpa_XP_002314837 SPAFS-----
A_lyrata_XP_002869489 ---AQMIL-----
aAtIAA11_At4g28640 DIMKQIIIEEPEPFMEAVIRQITDQREDKNIVRSFFFFSPLYSSFFFGSAIFLLVSYMFSL
P_trichocarpa_XP_002303110 ---K-----
O_sativa_Os02g0817600_NP_001048522 QRYQGIHRTIASTRGRS-----
A_lyrata_XP_002889491 M-----
aAtIAA10_At1g04100 K-----
A_lyrata_XP_002881274 ARNQEPNERQRKQPV-----
aAtIAA13_At2g33310 ARNQEPNERQRKQPV-----
A_lyrata_XP_002889513 PRHQEQKDRQRNNPV-----
aAtIAA12_BDL_At1g04550 PRRQEQKDRQRNNPV-----
P_trichocarpa_XP_002311698 PRFQDRNEKQRIKPV-----
P_trichocarpa_XP_002314509 PRLQDRNEKQRSKPV-----
A_lyrata_XP_002885143 -----ALTFGWSKQEKMKH-----
aAtIAA26_At3g16500 -----ALTFGCSKQEKMMH-----
A_lyrata_XP_002891672 -----ALTYGNGKQEKMR-----
aAtIAA18_At1g51950 -----ALTYGNGKQEKMR-----
O_sativa_Os02g0228900_NP_001046357 -----SLITSGRKRTAAEC-----
P_trichocarpa_XP_002309532 -----AFTLKSSS-----
P_trichocarpa_XP_002324753 R-----AFTFKL-----
P_trichocarpa_XP_002303315 -----ALNLGSSKHEKVPV-----
O_sativa_Os01g0741900_NP_001044208 -----HTLIGATARV-----
O_sativa_Os05g0523300_NP_001056086 -----HDMIGADPVK-----
O_sativa_Os01g0190300_NP_001042263 -----SLMRAAGSRKRAAADS-----
A_lyrata_XP_002872184 -----SLSPRKHGKE-----
aAtIAA28_At5g25890 -----SLSPRKHGKE-----
O_sativa_Os08g0109400_NP_001060811 R-----
P_patens_IAA1A_BAB71765 PK----NADPTKVQVAVG--
P_patens_IAA1B_BAB71766 PK----NADPTKVQVAVG--
P_patens_XP_001765051 PK----NPDSMKAQGAVG--
A_lyrata_XP_002882951 -----LQPRGVDE-----
aAtIAA19_MSG2_At3g15540 -----LQPRGVDE-----
A_lyrata_XP_002894404 -----LQRD-----
aAtIAA6_SHY1_At1g52830 -----LQOD-----
P_trichocarpa_XP_002299626 -----LQPRGALQGNISKDDR-----
P_trichocarpa_XP_002304179 -----LQPRGALKG--ISKDERH-----
A_lyrata_XP_002892874 -----
aAtIAA5_At1g15580 -----
A_lyrata_XP_002887832 -----
aAtIAA15_At1g80390 -----
P_trichocarpa_XP_002299625 PR----TPSKCSSS-----
O_sativa_Os01g0178500_NP_001042192 PR----AAQ-----
O_sativa_Os05g0178600_NP_001054800 PR----SA-----
O_sativa_Os06g0597000_NP_001057986 PR----RSSR-----
O_sativa_Os03g0633800_NP_001050714 -----SPROMKI-----
O_sativa_Os12g0601400_NP_001067210 -----ATR-----
O_sativa_Os03g0797800_NP_001051565 -----
O_sativa_Os07g0182400_NP_001059051 -----
P_trichocarpa_XP_002300804 -----C-----
P_trichocarpa_XP_002307625 -----C-----
P_trichocarpa_XP_002319642 -----CAV-----
P_trichocarpa_XP_002328339 -----CAV-----
P_trichocarpa_XP_002312567 -----CGA-----
P_trichocarpa_XP_002314656 -----
A_lyrata_XP_002870306 -----PAL-----
aAtIAA1_AXR5_At4g14560 -----TAL-----
A_lyrata_XP_002885542 -----SSL-----
aAtIAA2_At3g23030 -----SSL-----
A_lyrata_XP_002865407 -----SGV-----

```

|                                    |                                    |
|------------------------------------|------------------------------------|
| aAtIAA4_At5g43700                  | -----CGGL-----                     |
| A_lyrata_XP_002892202              | -----CGV-----                      |
| aAtIAA3_SHY2_At1g04240             | -----CGV-----                      |
| A_lyrata_XP_002864971              | AAPR--AMEKSKMRAQKMEHDKNLHWILKIFV-- |
| O_sativa_Os090527700_NP_001063732  | SNA-----                           |
| A_lyrata_XP_002868277              | PR---AMEKFKNRS-----                |
| aAtIAA14_SLR_At4g14550             | PR---AMEKFKNRS-----                |
| A_lyrata_XP_002883395              | PR---AMEKYCKNRY-----               |
| aAtIAA7_AXR2_At3g23050             | -----                              |
| P_trichocarpa_XP_002311658         | PR---AMEKCKSRT-----                |
| A_lyrata_XP_002889499              | PR---AMEKCKSRA-----                |
| aAtIAA17_AXR3_At1g04250            | PR---AMEKCKSRA-----                |
| A_lyrata_XP_002884465              | PR---ALEKCKNRS-----                |
| aAtIAA16_At3g04730                 | PR---ALEKCKNRS-----                |
| P_trichocarpa_XP_002302075         | PR---AMEKCKNRSYK-----              |
| P_trichocarpa_XP_002328494         | PR---AVEKCKNRS-----                |
| P_trichocarpa_XP_002319075         | PR---AVEKCKNRI-----                |
| P_trichocarpa_XP_002306817         | NE---YTA-----                      |
| O_sativa_Os03g0633500_NP_001050713 | HTKGSQEMQELKLIKEN-----             |
| O_sativa_Os12g0601300_NP_001067209 | PR---AMEKCKNRS-----                |
| O_sativa_Os03g0742900_NP_001051230 | PR---AKDKYKNKS-----                |
| O_sativa_Os01g0675700_NP_001043847 | ----PRSIEQSGQSR-----               |
| O_sativa_Os05g0559400_NP_001056300 | ----PRSLQOTGQNK-----               |
| O_sativa_Os01g0231000_NP_001042495 | ----PRAGEKSKNRN-----               |
| O_sativa_Os06g0335500_NP_001057554 | ----PRATDKSKNRN-----               |
| P_trichocarpa_XP_002298231         | ----PRAMEKCKNRN-----               |
| P_trichocarpa_XP_002303297         | ----PRAMEKCKNRN-----               |
| P_trichocarpa_XP_002331172         | ----PRAMEKCKSRN-----               |
| A_lyrata_XP_002867425              | ----PRVMEKCRSRN-----               |
| aAtIAA27_PAP2_At4g29080            | ----PRVMEKCRSRN-----               |
| aAtIAA8_At2g22670                  | ----PGAVEKSKNKERV-----             |
| aAtIAA9_At5g5670                   | AA--PRAMEKSKMRA-----               |
| A_lyrata_XP_002864969              | AA--PRAMEKSKMRA-----               |
| A_lyrata_XP_002878628              | ----PGAVEKSKNKERV-----             |
| A_lyrata_XP_002862301              | -----                              |
| P_trichocarpa_XP_002302351         | ----PRAMEKCKNRN-----               |

|                                    |      |      |
|------------------------------------|------|------|
| [                                  | 781  | 784] |
| aAtIAA29_At4g32280                 | ---- |      |
| P_trichocarpa_XP_002308067         | ---- |      |
| P_trichocarpa_XP_002324639         | ---- |      |
| P_trichocarpa_XP_002309635         | ---- |      |
| P_trichocarpa_XP_002300855         | GRCS |      |
| P_trichocarpa_XP_002307573         | ---- |      |
| O_sativa_Os02g0141100_NP_001045857 | E--- |      |
| O_sativa_Os02g0805100_NP_001048437 | ---- |      |
| O_sativa_Os06g0166500_NP_001056915 | ---- |      |
| A_lyrata_XP_002864517              | ---- |      |
| P_trichocarpa_XP_002324470         | ---- |      |
| O_sativa_Os04g0653300_NP_001054106 | ---- |      |
| A_lyrata_XP_002878437              | ---- |      |
| aAtIAA33_At5g57420                 | ---- |      |
| aAtIAA30_At3g62100                 | ---- |      |
| A_lyrata_XP_002880275              | ---- |      |
| aAtIAA20_At2g46990                 | ---- |      |
| P_trichocarpa_XP_002302809         | ---- |      |
| P_trichocarpa_XP_002320253         | ---- |      |
| O_sativa_Os01g0286900_NP_001042778 | ---- |      |
| O_sativa_Os02g0723400_NP_001047972 | ---- |      |
| A_lyrata_XP_002885218              | ---- |      |
| aAtIAA31_At3g17600                 | ---- |      |
| O_sativa_Os11g0221300_NP_001067526 | ---- |      |
| A_lyrata_XP_002875064              | ---- |      |
| aAtIAA32_MEE10_At2g01200           | ---- |      |
| aAtIAA34_At1g15050                 | ---- |      |
| A_lyrata_XP_002892847              | ---- |      |
| P_trichocarpa_XP_002314837         | ---- |      |
| A_lyrata_XP_002869489              | ---- |      |
| aAtIAA11_At4g28640                 | ---- |      |
| P_trichocarpa_XP_002303110         | ---- |      |
| O_sativa_Os02g0817600_NP_001048522 | ---- |      |
| A_lyrata_XP_002889491              | ---- |      |
| aAtIAA10_At1g04100                 | ---- |      |

A\_lyrata\_XP\_002881274 ----  
aAtIAA13\_At2g33310 ----  
A\_lyrata\_XP\_002889513 ----  
aAtIAA12\_BDL\_At1g04550 ----  
P\_trichocarpa\_XP\_002311698 ----  
P\_trichocarpa\_XP\_002314509 ----  
A\_lyrata\_XP\_002885143 ----  
aAtIAA26\_At3g16500 ----  
A\_lyrata\_XP\_002891672 ----  
aAtIAA18\_At1g51950 ----  
O\_sativa\_Os02g0228900\_NP\_001046357 ----  
P\_trichocarpa\_XP\_002309532 ----  
P\_trichocarpa\_XP\_002324753 ----  
P\_trichocarpa\_XP\_002303315 ----  
O\_sativa\_Os01g0741900\_NP\_001044208 ----  
O\_sativa\_Os05g0523300\_NP\_001056086 ----  
O\_sativa\_Os01g0190300\_NP\_001042263 ----  
A\_lyrata\_XP\_002872184 ----  
aAtIAA28\_At5g25890 ----  
O\_sativa\_Os08g0109400\_NP\_001060811 ----  
P\_patens\_IAA1A\_BAB71765 ----  
P\_patens\_IAA1B\_BAB71766 ----  
P\_patens\_XP\_001765051 ----  
A\_lyrata\_XP\_002882951 ----  
aAtIAA19\_MSG2\_At3g15540 ----  
A\_lyrata\_XP\_002894404 ----  
aAtIAA6\_SHY1\_At1g52830 ----  
P\_trichocarpa\_XP\_002299626 ----  
P\_trichocarpa\_XP\_002304179 ----  
A\_lyrata\_XP\_002892874 ----  
aAtIAA5\_At1g15580 ----  
A\_lyrata\_XP\_002887832 ----  
aAtIAA15\_At1g80390 ----  
P\_trichocarpa\_XP\_002299625 ----  
O\_sativa\_Os01g0178500\_NP\_001042192 ----  
O\_sativa\_Os05g0178600\_NP\_001054800 ----  
O\_sativa\_Os06g0597000\_NP\_001057986 ----  
O\_sativa\_Os03g0633800\_NP\_001050714 ----  
O\_sativa\_Os12g0601400\_NP\_001067210 ----  
O\_sativa\_Os03g0797800\_NP\_001051565 ----  
O\_sativa\_Os07g0182400\_NP\_001059051 ----  
P\_trichocarpa\_XP\_002300804 ----  
P\_trichocarpa\_XP\_002307625 ----  
P\_trichocarpa\_XP\_002319642 ----  
P\_trichocarpa\_XP\_002328339 ----  
P\_trichocarpa\_XP\_002312567 ----  
P\_trichocarpa\_XP\_002314656 ----  
A\_lyrata\_XP\_002870306 ----  
aAtIAA1\_AXR5\_At4g14560 ----  
A\_lyrata\_XP\_002885542 ----  
aAtIAA2\_At3g23030 ----  
A\_lyrata\_XP\_002865407 ----  
aAtIAA4\_At5g43700 ----  
A\_lyrata\_XP\_002892202 ----  
aAtIAA3\_SHY2\_At1g04240 ----  
A\_lyrata\_XP\_002864971 ----  
O\_sativa\_Os090527700\_NP\_001063732 ----  
A\_lyrata\_XP\_002868277 ----  
aAtIAA14\_SLR\_At4g14550 ----  
A\_lyrata\_XP\_002883395 ----  
aAtIAA7\_AXR2\_At3g23050 ----  
P\_trichocarpa\_XP\_002311658 ----  
A\_lyrata\_XP\_002889499 ----  
aAtIAA17\_AXR3\_At1g04250 ----  
A\_lyrata\_XP\_002884465 ----  
aAtIAA16\_At3g04730 ----  
P\_trichocarpa\_XP\_002302075 ----  
P\_trichocarpa\_XP\_002328494 ----  
P\_trichocarpa\_XP\_002319075 ----  
P\_trichocarpa\_XP\_002306817 ----  
O\_sativa\_Os03g0633500\_NP\_001050713 ----  
O\_sativa\_Os12g0601300\_NP\_001067209 ----  
O\_sativa\_Os03g0742900\_NP\_001051230 ----

O\_sativa\_Os01g0675700\_NP\_001043847 ----  
O\_sativa\_Os05g0559400\_NP\_001056300 ----  
O\_sativa\_Os01g0231000\_NP\_001042495 ----  
O\_sativa\_Os06g0335500\_NP\_001057554 ----  
P\_trichocarpa\_XP\_002298231 ----  
P\_trichocarpa\_XP\_002303297 ----  
P\_trichocarpa\_XP\_002331172 ----  
A\_lyrata\_XP\_002867425 ----  
aAtIAA27\_PAP2\_At4g29080 ----  
aAtIAA8\_At2g22670 ----  
aAtIAA9\_At5g65670 ----  
A\_lyrata\_XP\_002864969 ----  
A\_lyrata\_XP\_002878628 ----  
A\_lyrata\_XP\_002862301 ----  
P\_trichocarpa\_XP\_002302351 ----

;  
endblock;
